# Supplementary material
Source: PubMed Central journal article supplement (PMC5373900)
Supplement: NIHMS843142-supplement-Supporting_Information.pdf [file NIHMS843142-supplement-Supporting_Information.pdf]

## Contents:

X-ray Crystal Data and Structure Refinement

Table S1. Bond lengths [Å] and angles [°] for **15**.

Gaussian archive log entries for optimized geometries

Table S2. HOMO and LUMO energies from B3LYP/6-311+G(2df,2p) density functional calculations.

Table S3. CHelpG charges from B3LYP/6-311+G(2df,2p)-optimized geometries, calculated at the same level of theory.

Table S4. CHelpG charges from B3LYP/6-31G(d)-optimized geometries, calculated at the same level of theory.

Table S5. Force constants for new chemical groups from B3LYP/6-31G(d)-optimized geometries, calculated at the same level of theory.

Figure S1 Total ion chromatograms (TIC) of time-dependent consumption of (A) SeMet (=SeM) or (B) TFSeM in reactions with MAT.

Figure S2. Total ion chromatograms of boiled crude lysate with (A) SeM (= SeMet) or (B) TFSeM and crude lysate filtrate with (C) SeM or (D) TFSeM (= TFSeMet).

Synthesis and Purity:

1. (*S*)-*tert*-Butyl 4-selenocyanato-2-(*tert*-butoxycarbonylamino)butanoate (**15**)
2. (*S*)-*tert*-Butyl 4-trifluoromethylselanyl-2-(*tert*-butoxycarbonylamino) butanoate (**16**)
3. (*S*)-1-Carboxy-3-((trifluoromethyl)selanyl)propan-1-aminium 2,2,2-trifluoroacetate (**7a**)
4. (*S*)-1-Carboxy-3-((trifluoromethyl)selanyl)propan-1-aminium chloride (**7b**)

## X-ray Crystal Data and Structure Refinement

Crystal data and structure refinement for (*S*)-*tert*-butyl 4-selenocyanato-2-(*tert*-butoxycarbonylamino)butanoate (**15**).

|                                   |                                                            |                  |
|-----------------------------------|------------------------------------------------------------|------------------|
| Empirical formula                 | $C_{14}H_{24}N_2O_4Se$                                     |                  |
| Formula weight                    | 363.31                                                     |                  |
| Temperature                       | 100(2) K                                                   |                  |
| Wavelength                        | 0.71073 Å                                                  |                  |
| Crystal system                    | Orthorhombic                                               |                  |
| Space group                       | $P2_12_12_1$                                               |                  |
| Unit cell dimensions              | $a = 5.3393(16)$ Å                                         | $a = 90^\circ$ . |
|                                   | $b = 16.636(5)$ Å                                          | $b = 90^\circ$ . |
|                                   | $c = 19.468(6)$ Å                                          | $c = 90^\circ$ . |
| Volume                            | $1729.3(9)$ Å <sup>3</sup>                                 |                  |
| Z                                 | 4                                                          |                  |
| Density (calculated)              | 1.395 Mg/m <sup>3</sup>                                    |                  |
| Absorption coefficient            | 2.187 mm <sup>-1</sup>                                     |                  |
| F(000)                            | 752                                                        |                  |
| Crystal size                      | 0.52 x 0.15 x 0.12 mm <sup>3</sup>                         |                  |
| Theta range for data collection   | 1.61 to 28.30°.                                            |                  |
| Index ranges                      | $-7 \leq h \leq 7, -21 \leq k \leq 21, -25 \leq l \leq 25$ |                  |
| Reflections collected             | 14681                                                      |                  |
| Independent reflections           | 4011 [R(int) = 0.1339]                                     |                  |
| Completeness to theta = 25.00°    | 100.0 %                                                    |                  |
| Absorption correction             | Semi-empirical from equivalent                             |                  |
| Max. and min. transmission        | 0.7793 and 0.3959                                          |                  |
| Refinement method                 | Full-matrix least-squares on F <sup>2</sup>                |                  |
| Data / restraints / parameters    | 4011 / 0 / 199                                             |                  |
| Goodness-of-fit on F <sup>2</sup> | 1.004                                                      |                  |
| Final R indices [I > 2σ(I)]       | R1 = 0.0505, wR2 = 0.0950                                  |                  |
| R indices (all data)              | R1 = 0.0672, wR2 = 0.1008                                  |                  |
| Absolute structure parameter      | -0.010(12)                                                 |                  |
| Largest diff. peak and hole       | 1.606 and -0.648 e·Å <sup>-3</sup>                         |                  |

**Table S1.** Bond lengths [Å] and angles [°] for **15**

---

|                  |           |
|------------------|-----------|
| Se(1)-C(1)       | 1.859(4)  |
| Se(1)-C(2)       | 1.981(4)  |
| N(1)-C(5)        | 1.351(5)  |
| N(1)-C(4)        | 1.439(4)  |
| N(2)-C(1)        | 1.147(5)  |
| O(1)-C(5)        | 1.211(4)  |
| O(2)-C(5)        | 1.349(5)  |
| O(2)-C(6)        | 1.481(4)  |
| O(3)-C(10)       | 1.207(5)  |
| O(4)-C(10)       | 1.317(5)  |
| O(4)-C(11)       | 1.496(4)  |
| C(2)-C(3)        | 1.513(5)  |
| C(3)-C(4)        | 1.533(5)  |
| C(4)-C(10)       | 1.534(5)  |
| C(6)-C(7)        | 1.515(5)  |
| C(6)-C(8)        | 1.518(5)  |
| C(6)-C(9)        | 1.524(5)  |
| C(11)-C(13)      | 1.500(5)  |
| C(11)-C(14)      | 1.509(6)  |
| C(11)-C(12)      | 1.527(5)  |
|                  |           |
| C(1)-Se(1)-C(2)  | 97.66(18) |
| C(5)-N(1)-C(4)   | 118.7(3)  |
| C(5)-O(2)-C(6)   | 120.4(3)  |
| C(10)-O(4)-C(11) | 120.9(3)  |
| N(2)-C(1)-Se(1)  | 175.2(4)  |
| C(3)-C(2)-Se(1)  | 112.9(3)  |
| C(2)-C(3)-C(4)   | 113.3(3)  |
| N(1)-C(4)-C(3)   | 110.8(3)  |
| N(1)-C(4)-C(10)  | 114.5(3)  |
| C(3)-C(4)-C(10)  | 111.1(3)  |
| O(1)-C(5)-O(2)   | 126.6(3)  |
| O(1)-C(5)-N(1)   | 124.0(4)  |
| O(2)-C(5)-N(1)   | 109.4(3)  |
| O(2)-C(6)-C(7)   | 109.9(3)  |
| O(2)-C(6)-C(8)   | 103.1(3)  |

|                   |          |
|-------------------|----------|
| C(7)-C(6)-C(8)    | 110.3(4) |
| O(2)-C(6)-C(9)    | 110.2(3) |
| C(7)-C(6)-C(9)    | 112.0(3) |
| C(8)-C(6)-C(9)    | 110.9(3) |
| O(3)-C(10)-O(4)   | 127.1(3) |
| O(3)-C(10)-C(4)   | 120.1(4) |
| O(4)-C(10)-C(4)   | 112.9(3) |
| O(4)-C(11)-C(13)  | 111.4(3) |
| O(4)-C(11)-C(14)  | 107.9(3) |
| C(13)-C(11)-C(14) | 113.6(3) |
| O(4)-C(11)-C(12)  | 101.3(3) |
| C(13)-C(11)-C(12) | 111.3(3) |

## Gaussian archive log entries for optimized geometries:

### Methionine, Met

```
1\1\GINC-N312\FOpt\RB3LYP\6-311+G(2df,2p)\C6H13N1O2S1\MJPUSHIE\05-Jul-2012\0\#p RB3LYP/6-311+G(2df,2p) opt=(redundant,maxcycle=60) nosymm f req guess=read iop(1/8=8)\[methionine]charge neutral without continuu m geom opt and freqs\0,1\N,-1.2009253799,-3.6070091481,0.4665526731\C,-0.5250778152,-2.7895917017,-0.5521547126\C,0.7192459179,-3.541338326 1,-1.0559233224\O,1.168684072,-4.4836583095,-0.2145592961\O,1.26253976 91,-3.2904403802,-2.096980694\H,-1.149554406,-2.6036981997,-1.42926766 01\C,-0.1159557302,-1.4363042365,0.0592114485\C,0.431349163,-0.4174971 09,-0.9432383666\C,0.8205310829,0.8886629221,-0.2550284302\S,1.3816126 968,2.1162876793,-1.4866970586\C,1.7636484159,3.5062882386,-0.38105685 73\H,0.5150853095,-4.5270274232,0.5139464406\H,-1.7166846884,-3.039164 9331,1.1254122467\H,-1.8460441327,-4.2690103243,0.0543316576\H,-1.0056 062262,-1.0169568412,0.5400905681\H,0.6128819931,-1.6131026023,0.85519 72174\H,-0.3259985521,-0.2160812487,-1.7045198017\H,1.2916563112,-0.83 18653227,-1.4673388452\H,-0.0292989842,1.306266058,0.2894272479\H,1.62 74641377,0.7166910421,0.4598406937\H,2.111261415,4.3234778574,-1.00930 58613\H,2.5526371,3.2441924663,0.3224077727\H,0.8779775997,3.833102661 5,0.1621726908\Version=EM64L-G09RevC.01\HF=-840.0677176\RMSD=6.139e-0 9\RMSF=1.005e-05\Dipole=-1.6659205,0.46674,1.6680814\Quadrupole=2.4439 055,1.2997952,-3.7437007,13.1513255,4.9883515,-4.5766043\PG=C01 [X(C6H 13N1O2S1)]\@
```

### Selenomethionine, SeM

```
1\1\GINC-N309\FOpt\RB3LYP\6-311+G(2df,2p)\C6H13N1O2Se1\MJPUSHIE\05-Jul -2012\0\#p RB3LYP/6-311+G(2df,2p) opt=(redundant,maxcycle=60) nosymm freq guess=read iop(1/8=8)\[selenomethionine]charge neutral without c ontinuum geom opt and freqs\0,1\N,-1.2559226028,-2.6467370517,0.90565 91598\C,-0.5456578177,-1.8366948436,-0.0955127528\C,0.700714194,-2.603 4451954,-0.5707753524\O,1.1165180761,-3.5544107307,0.2778652367\O,1.27 26256142,-2.3564631386,-1.5974205206\H,-1.1466863865,-1.6424182844,-0. 9871070827\C,-0.1352139359,-0.4888177291,0.5268569126\C,0.4573781144,0 .52260356,-0.4589953035\C,0.8299662446,1.8255159701,0.239274859\Se,1.5 247183382,3.1422132124,-1.0588319549\C,1.8171082015,4.6080253027,0.212 1012943\H,0.4449162519,-3.5905420023,0.9902187612\H,-1.7774695322,-2.0 729706308,1.5547819201\H,-1.9017663248,-3.2977654113,0.4773742631\H,-1 .0326792072,-0.0558871194,0.9804172564\H,0.5672244006,-0.6745573426,1. 3441386835\H,-0.2705124801,0.7238562595,-1.2485904783\H,1.3320140698,0 .095904166,-0.9487268488\H,-0.0355173238,2.2730051247,0.7277767624\H,1 .6032078286,1.6593375173,0.988519128\H,2.2032692537,5.4462447947,-0.36 17336372\H,2.5473360729,4.3187144152,0.963048226\H,0.8802657953,4.8944 544254,0.6826466172\Version=EM64L-G09RevC.01\HF=-2843.3965753\RMSD=4. 033e-09\RMSF=1.063e-05\Dipole=-1.7316416,0.4643737,1.6047841\Quadrupol e=0.6333541,1.1750022,-1.8083562,10.0453333,3.4856962,-0.9520797\PG=C0 1 [X(C6H13N1O2Se1)]\@
```

### Trifluoromethionine (TFM)

1\GINC-N311\FOpt\RB3LYP\6-311+G(2df,2p)\C6H10F3N1O2S1\MJPUSHIE\06-Jul-2012\0\#p RB3LYP/6-311+G(2df,2p) opt=(redundant,maxcycle=60) nosymm  
freq guess=read iop(1/8=8)\[methionineCF3]charge neutral without con  
tinuum geom opt and freqs\0,1\N,-1.2442268607,-2.6357104984,0.8981733  
732\C,-0.5352128579,-1.8191853801,-0.0970449079\C,0.7169349463,-2.5767  
223808,-0.5746207561\O,1.1236160206,-3.5455460219,0.2554596103\O,1.298  
8427105,-2.3040918159,-1.5894716289\H,-1.1350888377,-1.6237449159,-0.9  
892583025\C,-0.1314213084,-0.4721965376,0.5310573684\C,0.4737223126,0.  
5341341118,-0.4511224362\C,0.839576013,1.8353367258,0.2605686261\S,1.5  
165589164,3.0195165302,-0.9669895309\C,1.7928724419,4.4338836842,0.129  
2480112\H,0.4490281326,-3.5941590294,0.9644987899\H,-1.759836445,-2.06  
91337508,1.5582155314\H,-1.89452377,-3.2798366497,0.4663913021\H,-1.03  
27887226,-0.0375834616,0.9743315046\H,0.5624969588,-0.6585764142,1.355  
2391278\H,-0.2442252603,0.7400462832,-1.2481035927\H,1.3536026944,0.10  
61520231,-0.9297240517\H,-0.0354923081,2.2873885136,0.7247422709\H,1.5  
948261578,1.6600179825,1.0247484965\F,2.28175612,5.4456865557,-0.59953  
24237\F,2.6708957185,4.1757244563,1.1173517983\F,0.6670736585,4.866463  
6601,0.7313274021\Version=EM64L-G09RevC.01\HF=-1137.8986607\RMSE=7.71  
8e-09\RMSEF=7.364e-06\Dipole=-2.040305,-0.6355008,1.1354477\Quadrupole=  
3.6407449,-7.0186359,3.377891,5.3202648,2.0961734,-4.1717461\PG=C01 [X  
(C6H10F3N1O2S1)]\@

### Trifluoroselenomethionine (TFSeM)

1\GINC-N309\FOpt\RB3LYP\6-311+G(2df,2p)\C6H10F3N1O2Se1\MJPUSHIE\06-Jul-2012\0\#p RB3LYP/6-311+G(2df,2p) opt=(redundant,maxcycle=60) nosym  
m freq guess=read iop(1/8=8)\[selenomethionineCF3]charge neutral with  
out continuum geom opt and freqs\0,1\N,-1.3284999095,-2.6447392382,0.  
8333955924\C,-0.4167807302,-1.8595791169,-0.0138924128\C,0.7957560918,  
-2.7377223783,-0.3939906797\O,0.5974472939,-4.0472703145,-0.2074574803  
\O,1.8184492393,-2.2981900431,-0.8460896643\H,-0.9385685342,-1.6815826  
206,-0.9586358804\C,-0.0014411983,-0.502620877,0.5818677441\C,0.556733  
8949,0.5021549132,-0.4337769647\C,0.8953258246,1.8291615171,0.23586897  
17\Se,1.5531711046,3.1086359515,-1.1252248348\C,1.6501588115,4.6636357  
747,0.0740920705\H,-0.2882061964,-4.1281588056,0.2051802258\H,-1.11382  
69382,-2.5304529462,1.8172113622\H,-2.294281619,-2.3800080055,0.697086  
3849\H,-0.8881445271,-0.0717015092,1.0545401349\H,0.7305977882,-0.6702  
220494,1.3767397908\H,-0.1872365024,0.6671408745,-1.2181482301\H,1.438  
7284722,0.0786995946,-0.9104170352\H,0.0213743981,2.2791975718,0.70147  
09099\H,1.6791661804,1.7104282362,0.9797985006\F,2.0549774237,5.728519  
9294,-0.6318200614\F,2.5155387442,4.4897784108,1.0886609381\F,0.463914  
9639,4.9680851624,0.6335302239\Version=EM64L-G09RevC.01\HF=-3141.2250  
055\RMSE=5.328e-09\RMSEF=5.987e-06\Dipole=-2.0281276,-0.5419253,0.91174  
95\Quadrupole=2.6332395,-10.6480759,8.0148364,5.2179076,1.4728544,-4.2  
833754\PG=C01 [X(C6H10F3N1O2Se1)]\@

**Methionine, Met, CHelpG output from B3LYP/6-31G(d)-optimized geometry**

```
1\1\GINC-N257\SP\RB3LYP\6-31G(d)\C6H13N1O2S1\MJPUSHIE\27-Jul-2012\0\#
#p RB3LYP/6-31G(d) iop(1/8=8) pop=(chelpg)\[methionine]charge neutral
without continuum CHELPG\0,1\N,0,-1.3740169732,-3.3538669726,0.661102
6855\C,0,-0.4792856029,-2.5295033665,-0.174227603\C,0,0.7616016665,-3.
3705461757,-0.5472705815\O,0,0.5890722754,-4.6903621899,-0.3860018133\
O,0,1.7832231287,-2.9013268259,-0.9722996392\H,0,-1.0005909862,-2.3643
681245,-1.1236293626\C,0,-0.1136135802,-1.1623309336,0.4306477061\C,0,
0.384049488,-0.1245980201,-0.5828208926\C,0,0.7022259419,1.2100274176,
0.0871555879\S,0,1.1693805288,2.4593493626,-1.1709247626\C,0,1.4862238
4,3.8868496185,-0.0827216364\H,0,-0.3033714979,-4.7902430724,0.0151877
986\H,0,-1.1658969809,-3.2338133916,1.6483999468\H,0,-2.3461610978,-3.
1024120586,0.5254166291\H,0,-1.0132245895,-0.7746967994,0.9211313886\H
,0,0.6372192925,-1.3071950002,1.2152564192\H,0,-0.3877664989,0.0290423
728,-1.345369647\H,0,1.2682588875,-0.5068675916,-1.0926177558\H,0,-0.1
648568131,1.5839281624,0.639049864\H,0,1.5321948003,1.0961069914,0.789
0770933\H,0,1.7762918229,4.7157483473,-0.7276598987\H,0,2.3013556829,3
.6766631028,0.6106105426\H,0,0.5883562651,4.1661671473,0.4699409308\
Version=EM64L-G09RevC.01\State=1-A\HF=-839.8628473\RMSD=5.906e-09\Dipol
e=-1.7992981,0.4982078,1.4882054\Quadrupole=1.5589606,-2.7066872,1.147
7266,8.880444,0.6337162,-0.3167806\PG=C01 [X(C6H13N1O2S1)]\@
```

**Selenomethionine, SeM, CHelpG output from B3LYP/6-31G(d)-optimized geometry**

```
1\1\GINC-N312\SP\RB3LYP\6-31G(d)\C6H13N1O2Se1\MJPUSHIE\27-Jul-2012\0\
#p RB3LYP/6-31G(d) pop=(chelpg,readatradii)\[selenomethionine]charge
neutral without continuum CHELPG\0,1\N,0,-1.4211761795,-2.5535437112,
1.0536429835\C,0,-0.7314067401,-1.7248106853,0.049197517\C,0,0.5253532
318,-2.4699022627,-0.4348058953\O,0,0.9563681747,-3.4220176126,0.40705
75367\O,0,1.0919954562,-2.2061610554,-1.4613524931\H,0,-1.3436528783,-
1.5393286154,-0.8384315148\C,0,-0.3403173292,-0.3712778747,0.673358605
5\C,0,0.2303993679,0.6520848263,-0.3150008443\C,0,0.5912660862,1.95783
58689,0.3857850317\Se,0,1.2496384773,3.2951669964,-0.9181022262\C,0,1.
5420924151,4.7594368168,0.3624830397\H,0,0.2810138405,-3.4679011038,1.
1200088306\H,0,-1.9438878025,-1.9863985342,1.7114583201\H,0,-2.0721925
56,-3.2009830581,0.6217999969\H,0,-1.2440863628,0.0464089869,1.1331035
278\H,0,0.3710714758,-0.5474572724,1.4875089916\H,0,-0.5090564615,0.84
63208226,-1.0981555775\H,0,1.1077165342,0.2375552487,-0.814077696\H,0,
-0.2762132504,2.3904816588,0.8874638175\H,0,1.3792105135,1.8009088966,
1.1239035088\H,0,1.908852687,5.6072956397,-0.2133355773\H,0,2.28903213
41,4.4727193215,1.1002799815\H,0,0.6064091661,5.0293967024,0.848630135
5\Version=EM64L-G09RevC.01\State=1-A\HF=-2841.0526939\RMSD=6.396e-09\
Dipole=-1.7497048,0.3925263,1.6030729\Quadrupole=3.3917801,-1.6102301,
-1.78155,11.4669884,-0.2454874,-2.385676\PG=C01 [X(C6H13N1O2Se1)]\@
```

**Trifluoromethionine (TFM), CHelpG output from B3LYP/6-31G(d)-optimized geometry**

```
1\1\GINC-N256\SP\RB3LYP\6-31G(d)\C6H10F3N1O2S1\MJPUSHIE\27-Jul-2012\0\
#p RB3LYP/6-31G(d) iop(1/8=8) pop=(chelpg)\[methionineCF3]charge neu
tral without continuum CHELPG\0,1\N,0,-1.4119816626,-2.5331339943,1.0
501443724\C,0,-0.7279139826,-1.6965950551,0.0498042992\C,0,0.526636141
```

4,-2.436303226,-0.4505808532\O,0,0.9512183632,-3.4117109622,0.36497373  
39\O,0,1.0953383552,-2.1456598249,-1.4690622841\H,0,-1.3455703612,-1.5  
028004822,-0.8323927965\C,0,-0.3316230128,-0.3488113903,0.6825310484\C  
,0,0.2480675741,0.6712940254,-0.3028663128\C,0,0.611843704,1.971188664  
7,0.4132071335\S,0,1.2547349089,3.1757493837,-0.8222489961\C,0,1.49373  
06908,4.5980221903,0.2737696822\H,0,0.2797031584,-3.4688198193,1.08081  
96911\H,0,-1.9206891816,-1.9736307817,1.7252773383\H,0,-2.0744413776,-  
3.1682021835,0.6174381877\H,0,-1.2334880481,0.0730136919,1.1414029176\  
H,0,0.3774118592,-0.5325897074,1.4968234338\H,0,-0.486470456,0.8760234  
374,-1.0873756063\H,0,1.1256735291,0.2539135371,-0.7986539683\H,0,-0.2  
608661933,2.4132442179,0.8945125709\H,0,1.3856531846,1.8006020893,1.16  
17711847\F,0,1.9561127405,5.623047539,-0.4575638642\F,0,2.3796266329,4  
.3651753117,1.2638068762\F,0,0.3556974335,5.0028043387,0.8768792118\\V  
ersion=EM64L-G09RevC.01\State=1-A\HF=-1137.5744888\RMSD=5.507e-09\Dipo  
le=-1.9956185,-0.5444505,1.2495399\Quadrupole=6.7771022,-6.4774269,-0.  
2996753,11.0790746,-0.0787281,-6.0995991\PG=C01 [X(C6H10F3N1O2S1)]\@

### Trifluoroselenomethionine (TFSeM), CHelpG output from B3LYP/6-31G(d)-optimized geometry

1\N\GINC-N312\SPRB3LYP6-31G(d)\C6H10F3N1O2Se1\MJPUSHIE\27-Jul-2012\O  
\#p RB3LYP/6-31G(d) pop=(chelpg,readatradii)\[selenomethionineCF3]ch  
arge neutral without continuum CHELPG\O,1\N,0,-1.4202119906,-2.553446  
152,1.0695383216\C,0,-0.7389616132,-1.7282999042,0.0578819069\C,0,0.51  
18610075,-2.4754818531,-0.4405513836\O,0,0.9372891588,-3.4444853534,0.  
3820835884\O,0,1.0775480568,-2.1953321647,-1.4637825247\H,0,-1.3603995  
294,-1.5423398708,-0.8233319678\C,0,-0.3367913263,-0.3749219189,0.6750  
415459\C,0,0.2388002044,0.6359017687,-0.3239797879\C,0,0.6138882721,1.  
9378771284,0.3770767006\Se,0,1.3049162504,3.2370411412,-0.9559412328\C  
,0,1.5217913278,4.7267117098,0.3096936995\H,0,0.2676347893,-3.49414900  
55,1.1004374922\H,0,-1.9210121241,-1.9864292308,1.7442073661\H,0,-2.08  
80748501,-3.1895143061,0.6469063637\H,0,-1.2348910224,0.0531885413,1.1  
35407623\H,0,0.3773664818,-0.5516729032,1.4863825355\H,0,-0.5031692433  
,0.8335999144,-1.1035255377\H,0,1.1090089923,0.2071392593,-0.823339158  
9\H,0,-0.2480018155,2.4001664266,0.856476186\H,0,1.3986361603,1.781106  
3738,1.1154702976\F,0,1.9797083997,5.7976587799,-0.3570063905\F,0,2.39  
49568139,4.452797518,1.2980128731\F,0,0.3665115997,5.0787051015,0.9092  
584838\\Version=EM64L-G09RevC.01\State=1-A\HF=-3138.7646675\RMSD=6.783  
e-09\Dipole=-1.9659483,-0.5288961,1.1577669\Quadrupole=6.7313934,-6.90  
26622,0.1712688,12.4678408,-1.1290624,-7.3584799\PG=C01 [X(C6H10F3N1O2  
Se1)]\@



**Table S2.** HOMO and LUMO energies from B3LYP/6-311+G(2df,2p) density functional calculations.

|                           | <b>Met</b>   | <b>SeM</b>   | <b>TFM</b>    | <b>TFSeM</b> |
|---------------------------|--------------|--------------|---------------|--------------|
| HOMO (AU)                 | -0.2246      | -0.2151      | -0.2698       | -0.2521      |
| LUMO (AU)                 | -0.0208      | -0.0214      | -0.0275       | -0.0359      |
| HOMO-LUMO Gap<br>(kJ/mol) | 535.2        | 508.7        | 636.1         | 567.7        |
| Gap Relative to Met       | <b>0.0</b>   | <b>-26.5</b> | <b>+100.9</b> | <b>+32.5</b> |
| Gap Relative to SeM       | <b>+26.5</b> | <b>0.0</b>   | <b>+127.4</b> | <b>+59.0</b> |

**Table S3.** CHelpG charges from B3LYP/6-311+G(2df,2p)-optimized geometries, calculated at the same level of theory.

| CHelpG Charges |               |        |        |        |        |
|----------------|---------------|--------|--------|--------|--------|
| Atom No.       | Atom Type     | Met    | SeM    | TFM    | TFSeM  |
| 1              | N             | -0.904 | -0.881 | -0.886 | -0.870 |
| 2              | H1            | 0.330  | 0.326  | 0.329  | 0.324  |
| 3              | H2            | 0.342  | 0.328  | 0.344  | 0.331  |
| 4              | C             | 0.721  | 0.704  | 0.705  | 0.595  |
| 5              | O1            | -0.534 | -0.528 | -0.520 | -0.492 |
| 6              | O2            | -0.578 | -0.578 | -0.570 | -0.533 |
| 7              | H3            | 0.339  | 0.331  | 0.336  | 0.315  |
| 8              | CA            | 0.309  | 0.361  | 0.295  | 0.469  |
| 9              | HA            | -0.039 | -0.044 | -0.026 | -0.027 |
| 10             | CB            | -0.058 | -0.226 | -0.168 | -0.388 |
| 11             | HB1           | 0.029  | 0.059  | 0.068  | 0.064  |
| 12             | HB2           | 0.009  | 0.046  | 0.052  | 0.092  |
| 13             | CG            | -0.048 | 0.164  | 0.002  | 0.330  |
| 14             | HG1           | 0.041  | -0.019 | 0.043  | -0.058 |
| 15             | HG2           | 0.078  | 0.028  | 0.089  | -0.004 |
| 16             | CD            | -0.052 | -0.089 | -0.032 | -0.135 |
| 17             | HD1           | 0.071  | 0.061  | 0.067  | 0.078  |
| 18             | HD2           | 0.080  | 0.065  | 0.072  | 0.069  |
| 19             | Hetero (S/Se) | -0.261 | -0.207 | -0.193 | -0.111 |
| 20             | CZ            | -0.049 | -0.004 | 0.506  | 0.444  |
| 21             | XZ1 (H/F)     | 0.097  | 0.068  | -0.144 | -0.144 |
| 22             | XZ2 (H/F)     | 0.039  | 0.021  | -0.183 | -0.168 |

23

XZ3 (H/F)

0.038

0.014

-0.186

-0.181

---

**Table S4.** CHelpG charges from B3LYP/6-31G(d)-optimized geometries, calculated at the same level of theory.

| CHelpG Charges |               |        |        |        |        |
|----------------|---------------|--------|--------|--------|--------|
| Atom No.       | Atom Type     | Met    | SeM    | TFM    | TFSeM  |
| 1              | N             | -0.956 | -0.923 | -0.929 | -0.906 |
| 2              | H1            | 0.350  | 0.351  | 0.351  | 0.348  |
| 3              | H2            | 0.360  | 0.352  | 0.363  | 0.354  |
| 4              | C             | 0.521  | 0.617  | 0.613  | 0.618  |
| 5              | O1            | -0.499 | -0.509 | -0.503 | -0.503 |
| 6              | O2            | -0.476 | -0.526 | -0.520 | -0.526 |
| 7              | H3            | 0.343  | 0.342  | 0.346  | 0.341  |
| 8              | CA            | 0.523  | 0.372  | 0.338  | 0.349  |
| 9              | HA            | -0.041 | -0.041 | -0.031 | -0.027 |
| 10             | CB            | -0.285 | -0.261 | -0.205 | -0.376 |
| 11             | HB1           | 0.037  | 0.064  | 0.069  | 0.105  |
| 12             | HB2           | 0.057  | 0.064  | 0.064  | 0.105  |
| 13             | CG            | 0.074  | 0.157  | 0.014  | 0.246  |
| 14             | HG1           | 0.017  | -0.007 | 0.038  | -0.018 |
| 15             | HG2           | 0.023  | 0.030  | 0.079  | 0.035  |
| 16             | CD            | -0.039 | -0.129 | -0.019 | -0.164 |
| 17             | HD1           | 0.071  | 0.076  | 0.063  | 0.082  |
| 18             | HD2           | 0.086  | 0.080  | 0.069  | 0.080  |
| 19             | Hetero (S/Se) | -0.289 | -0.208 | -0.213 | -0.120 |
| 20             | CZ            | -0.080 | -0.074 | 0.398  | 0.340  |
| 21             | XZ1 (H/F)     | 0.110  | 0.094  | -0.100 | -0.098 |
| 22             | XZ2 (H/F)     | 0.049  | 0.042  | -0.141 | -0.130 |

23

XZ3 (H/F)

0.044

0.037

-0.144

-0.135

---

**Table S5.** Force constants for new chemical groups from B3LYP/6-31G(d)-optimized geometries, calculated at the same level of theory.

| <b>Force Constants<sup>a</sup></b> |            |            |            |              |
|------------------------------------|------------|------------|------------|--------------|
| <b>Bond Type</b>                   | <b>Met</b> | <b>SeM</b> | <b>TFM</b> | <b>TFSeM</b> |
| CH <sub>2</sub> -S                 | 33223      | -          | 85563      | -            |
| CH <sub>2</sub> -Se                | -          | 69108      | -          | 69126        |
| S-CH <sub>3</sub>                  | 98422      | -          | -          | -            |
| S-CF <sub>3</sub>                  | -          | -          | 110004     | -            |
| Se-CH <sub>3</sub>                 | -          | 62362      | -          | -            |
| Se-CF <sub>3</sub>                 | -          | -          | -          | 32235        |
| (S)CH <sub>2</sub> -H              | 389056     | -          | -          | -            |
| (S)CF <sub>2</sub> -F              | -          | -          | 378016     | -            |
| (Se)CH <sub>2</sub> -H             | -          | 394856     | -          | -            |
| (Se)CF <sub>2</sub> -F             | -          | -          | -          | 420014       |

a – Units are in kJ/mol/nm<sup>2</sup>

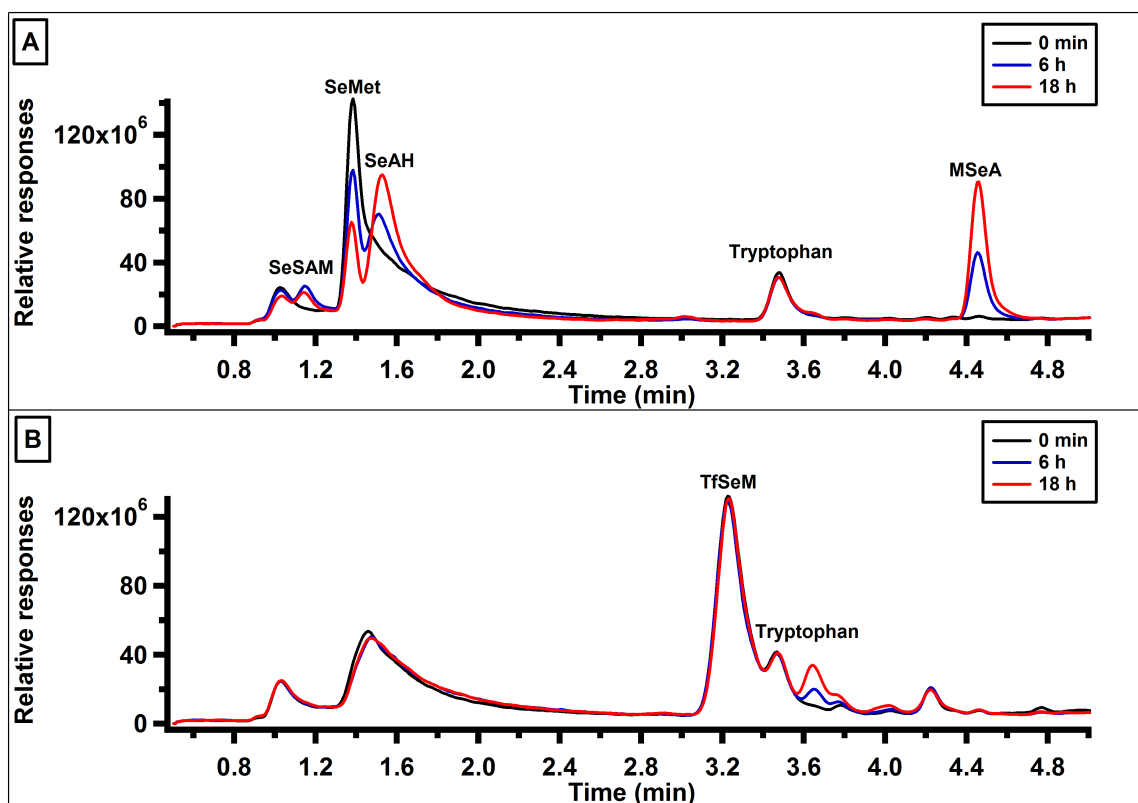

**Figure S1.** Total ion chromatograms (TIC) of time-dependent consumption of (A) SeMet (= SeM) or (B) TfSeM in reactions with MAT. Consumption of SeMet and formation of both SeSAM and SeAH in panel A indicated MAT was active and contaminated with a methyltransferase, whereas TfSeM remained constant over 18 h, indicating it is not a suitable substrate of MAT.

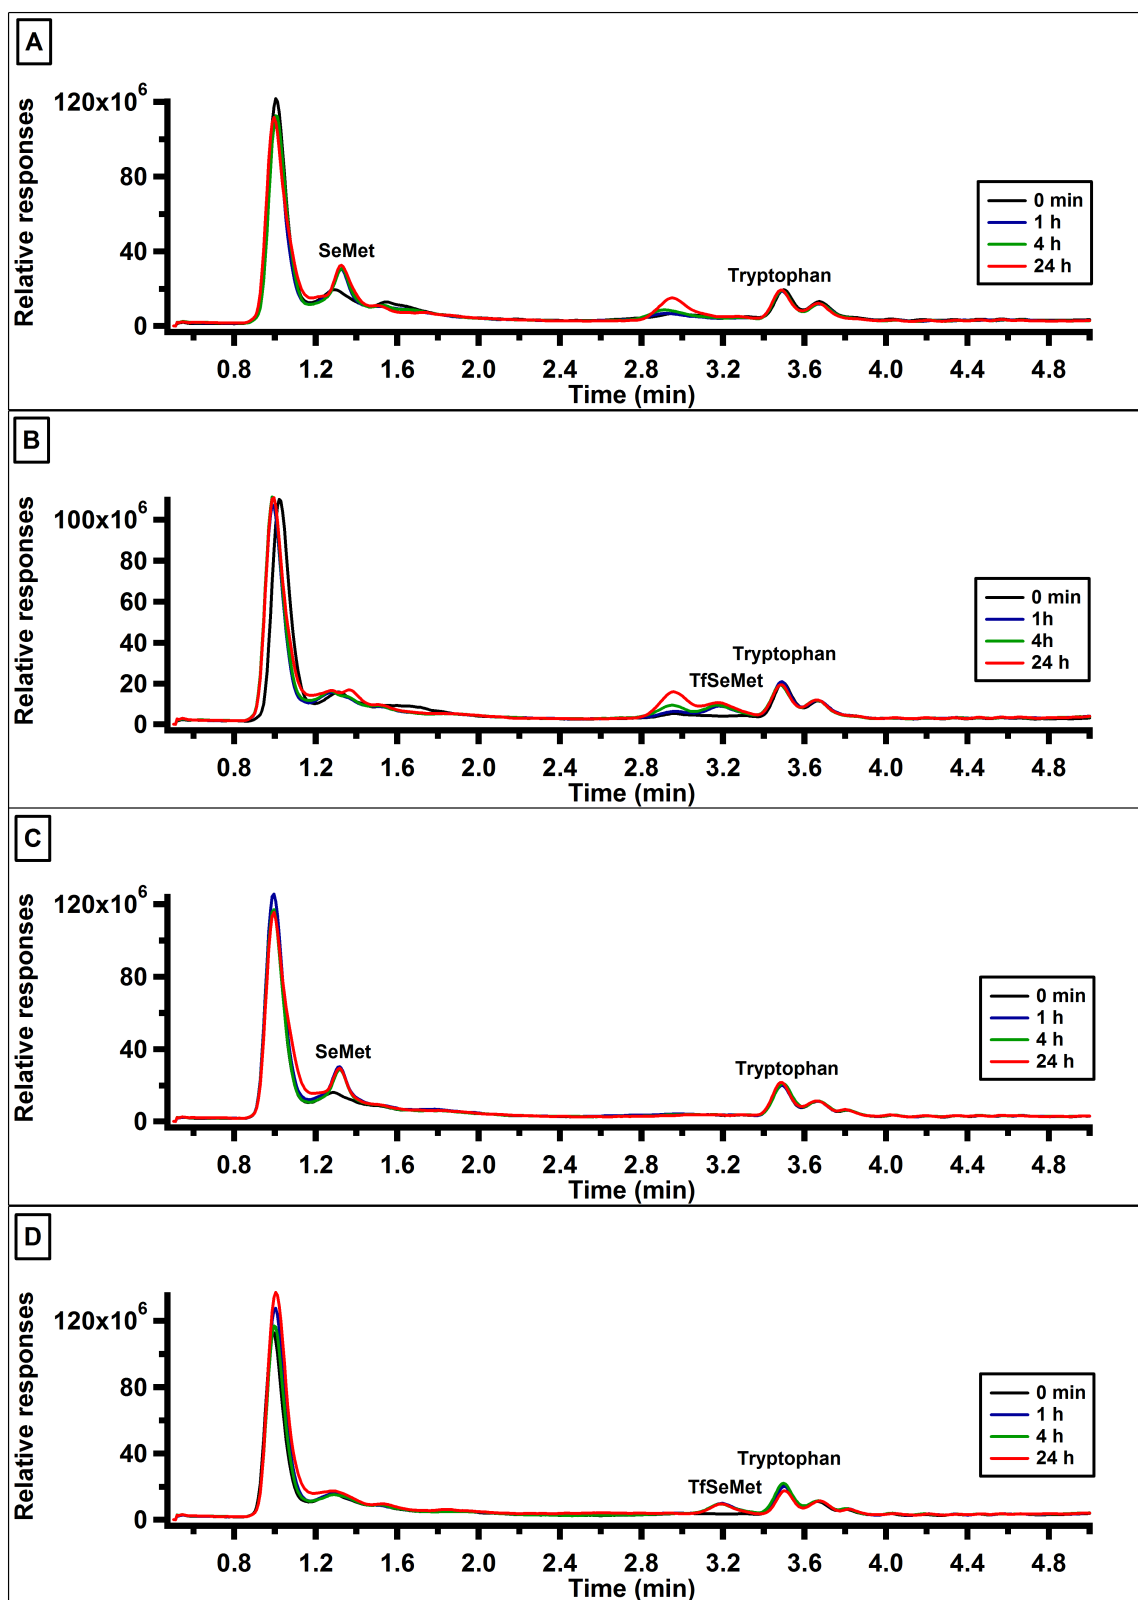

**Figure S2.** Total ion chromatograms of boiled crude lysate with (A) SeM (= SeMet) or (B) TFSeM and crude lysate filtrate with (C) SeM or (D) TFSeM (= TFSeMet). In each experiment SeM and TFSeM remained constant throughout the 24 h incubation.



## Synthesis and Purity

### $^1\text{H}$ NMR of 3-selenocyanatopropanenitrile (17)

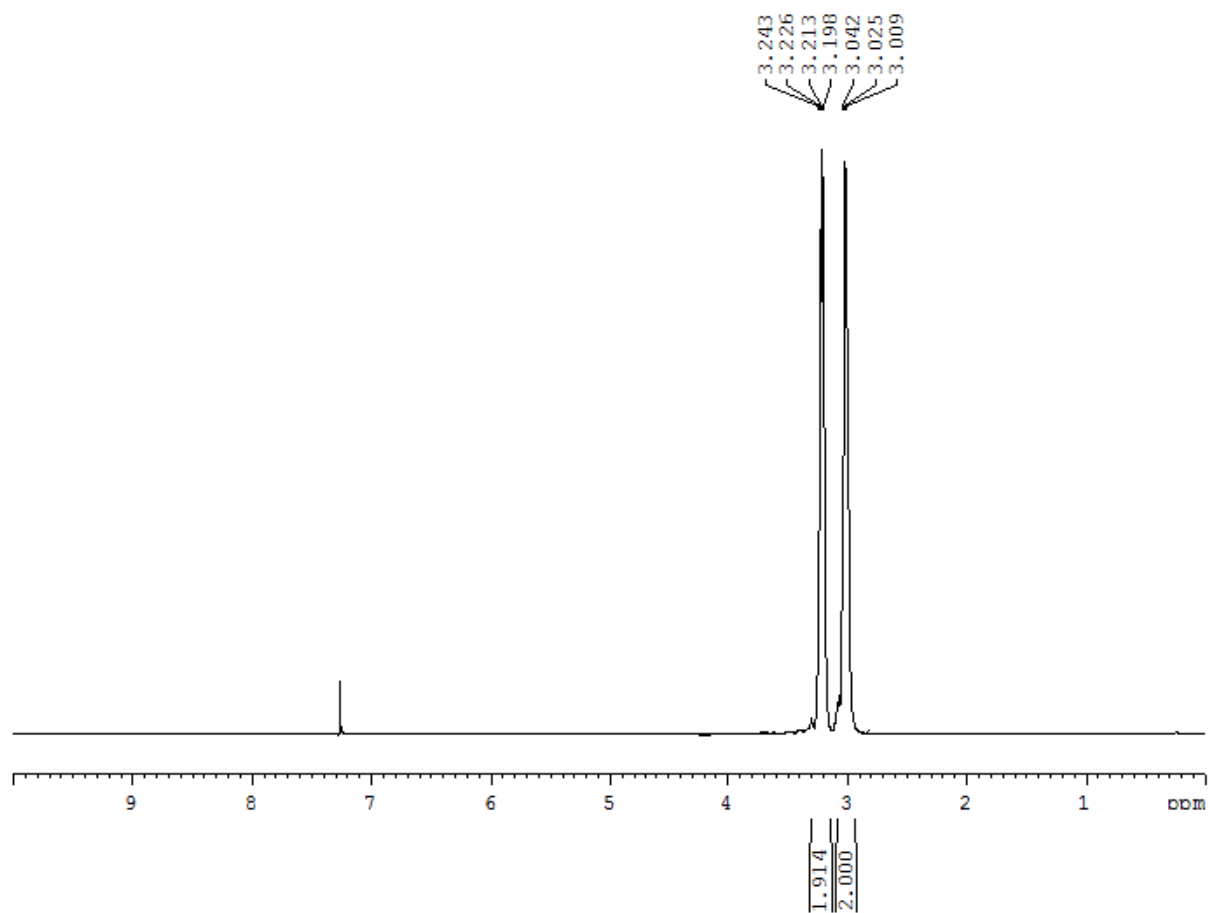

<sup>13</sup>C NMR of 3-selenocyanatopropanenitrile (17)

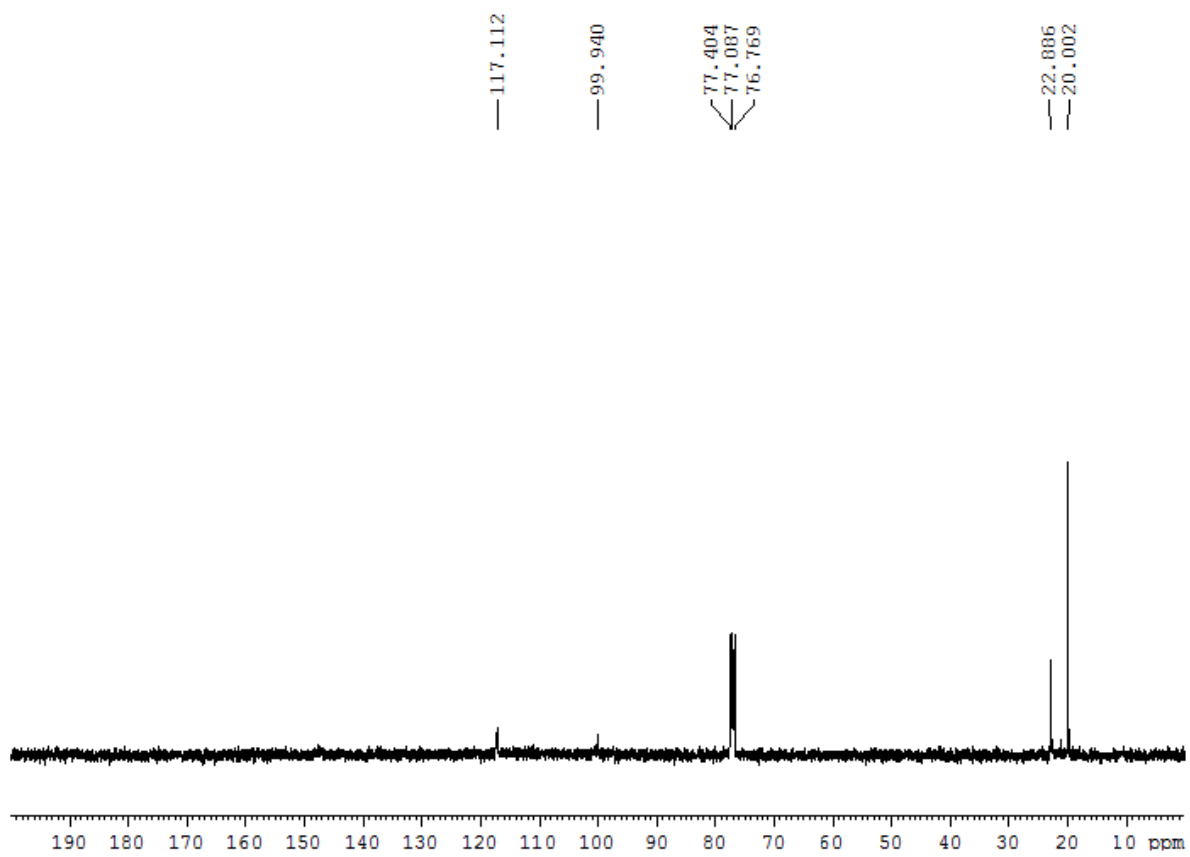

<sup>1</sup>H NMR of 3-(Trifluoromethylselenyl)propionitrile (18)

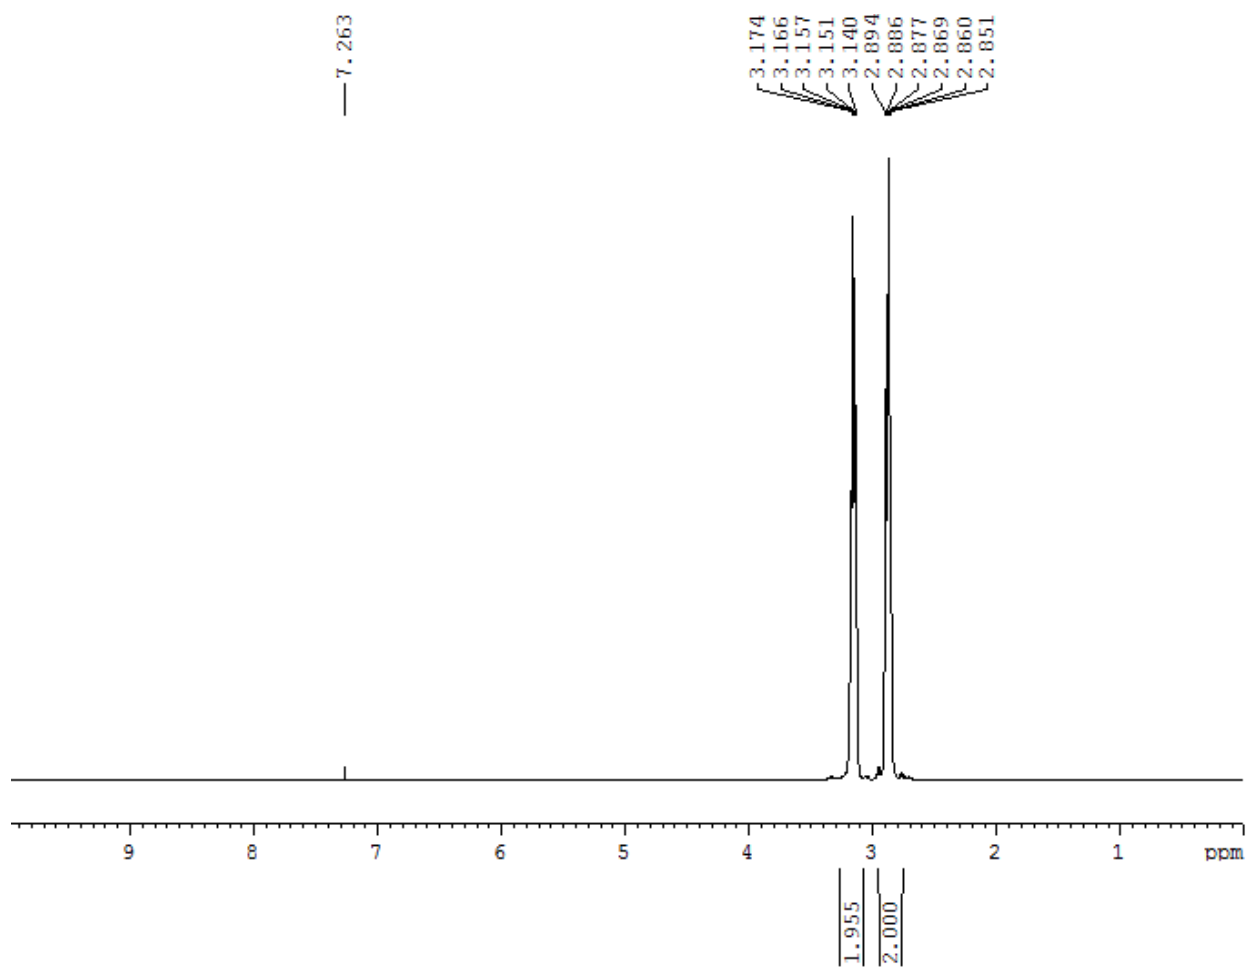

<sup>13</sup>C NMR of 3-(Trifluoromethylselanyl)propionitrile (18)

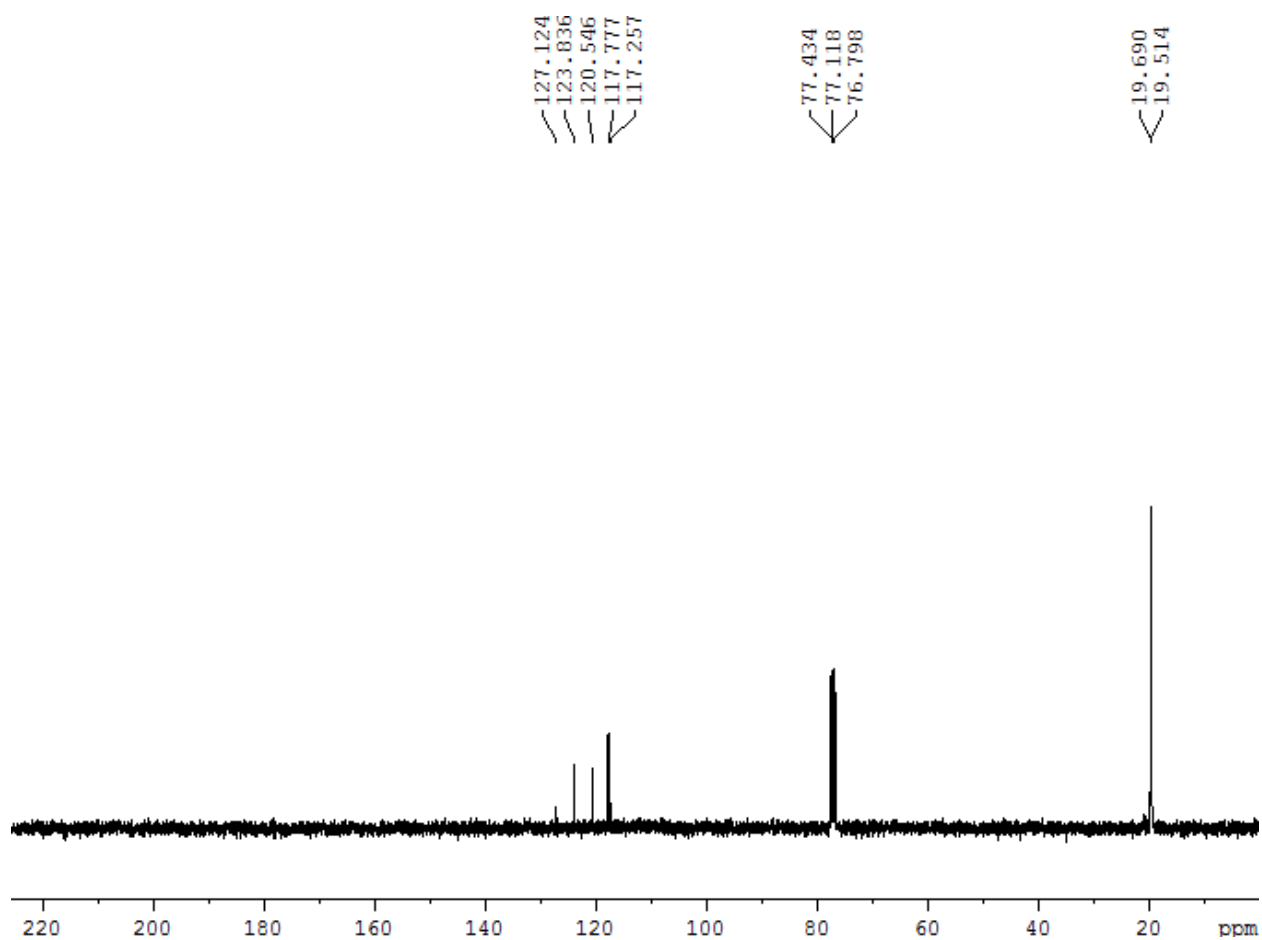

$^{19}\text{F}$  NMR of 3-(Trifluoromethylselenanyl)propionitrile (18)

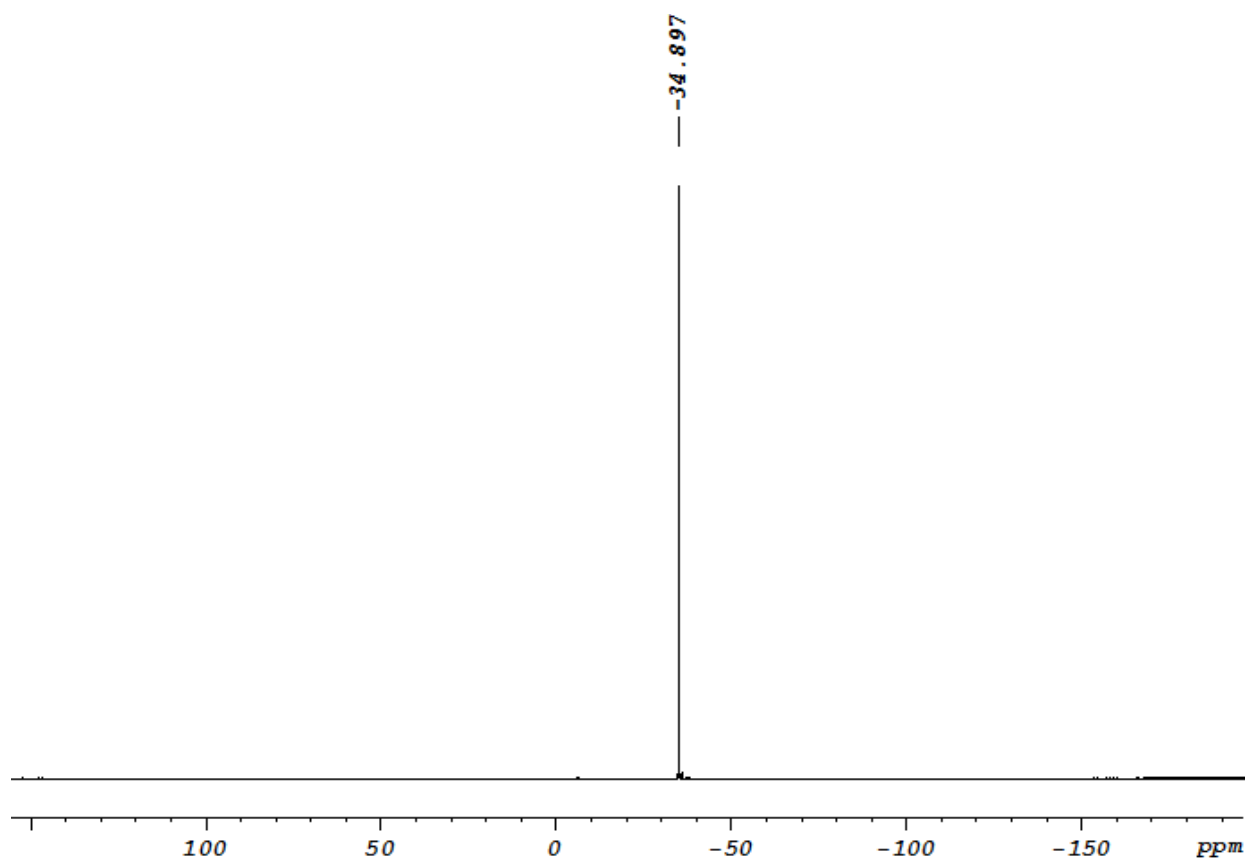

**(S)-tert-Butyl 4-selenocyanato-2-(tert-butoxycarbonylamino)butanoate (15)**

<sup>1</sup>H NMR in CDCl<sub>3</sub> (400 MHz)

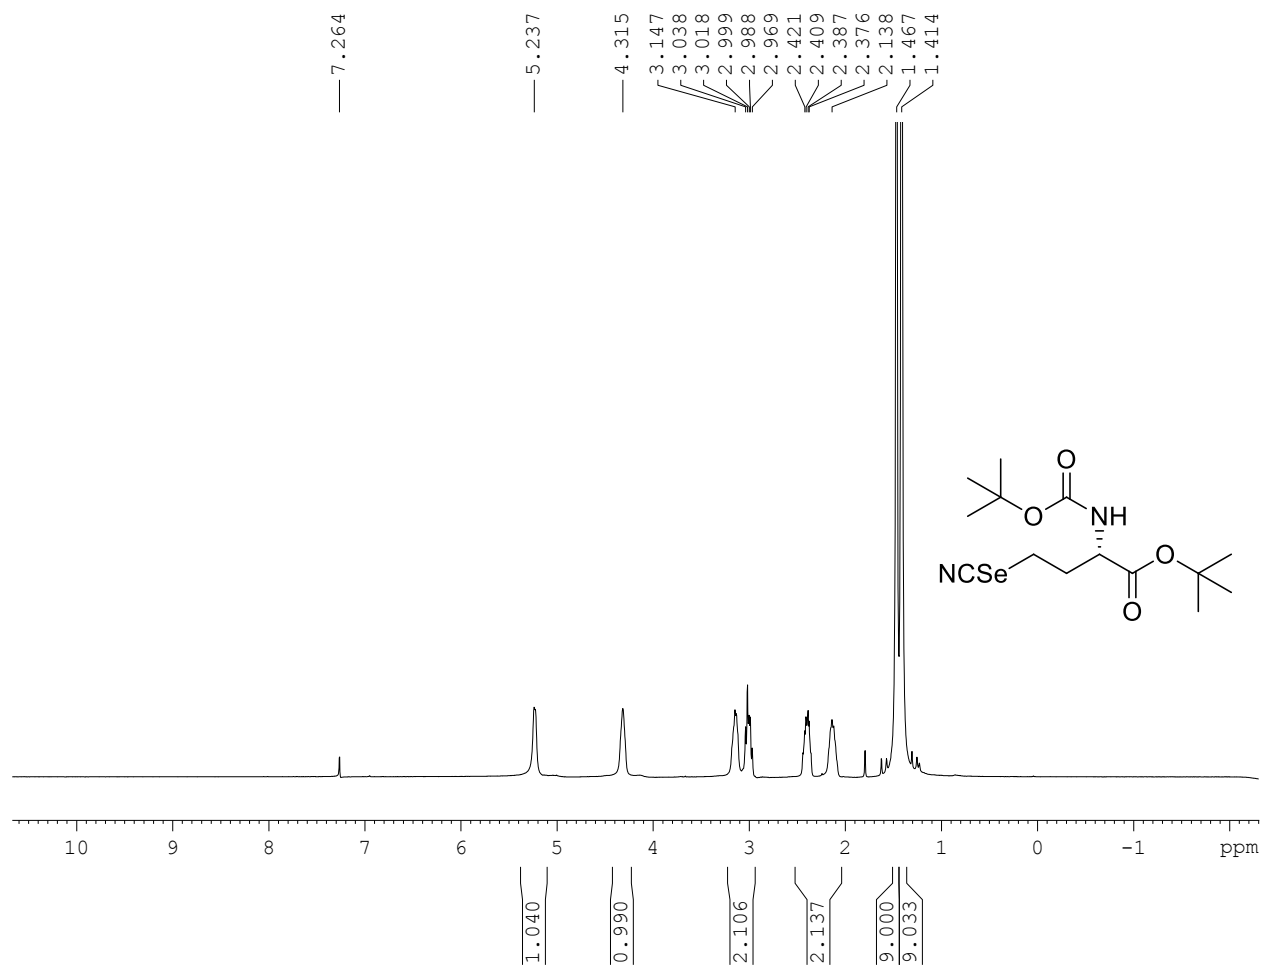

$^{13}\text{C}$  NMR in  $\text{CDCl}_3$  (100 MHz)

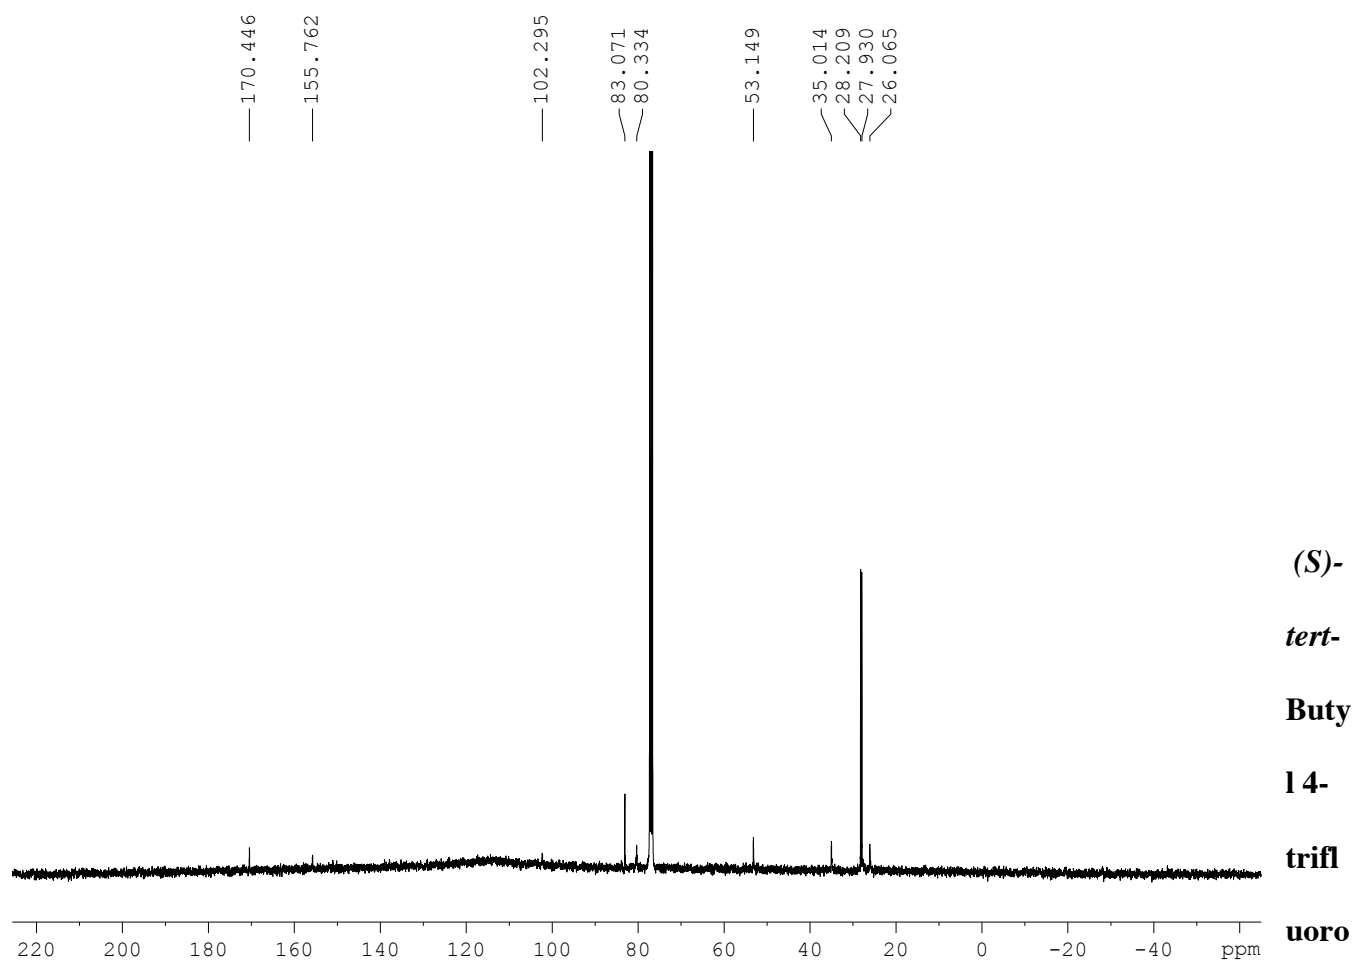

**methylselanyl-2-(*tert*-butoxycarbonylamino) butanoate (16).**

<sup>1</sup>H NMR in CDCl<sub>3</sub> (400 MHz)

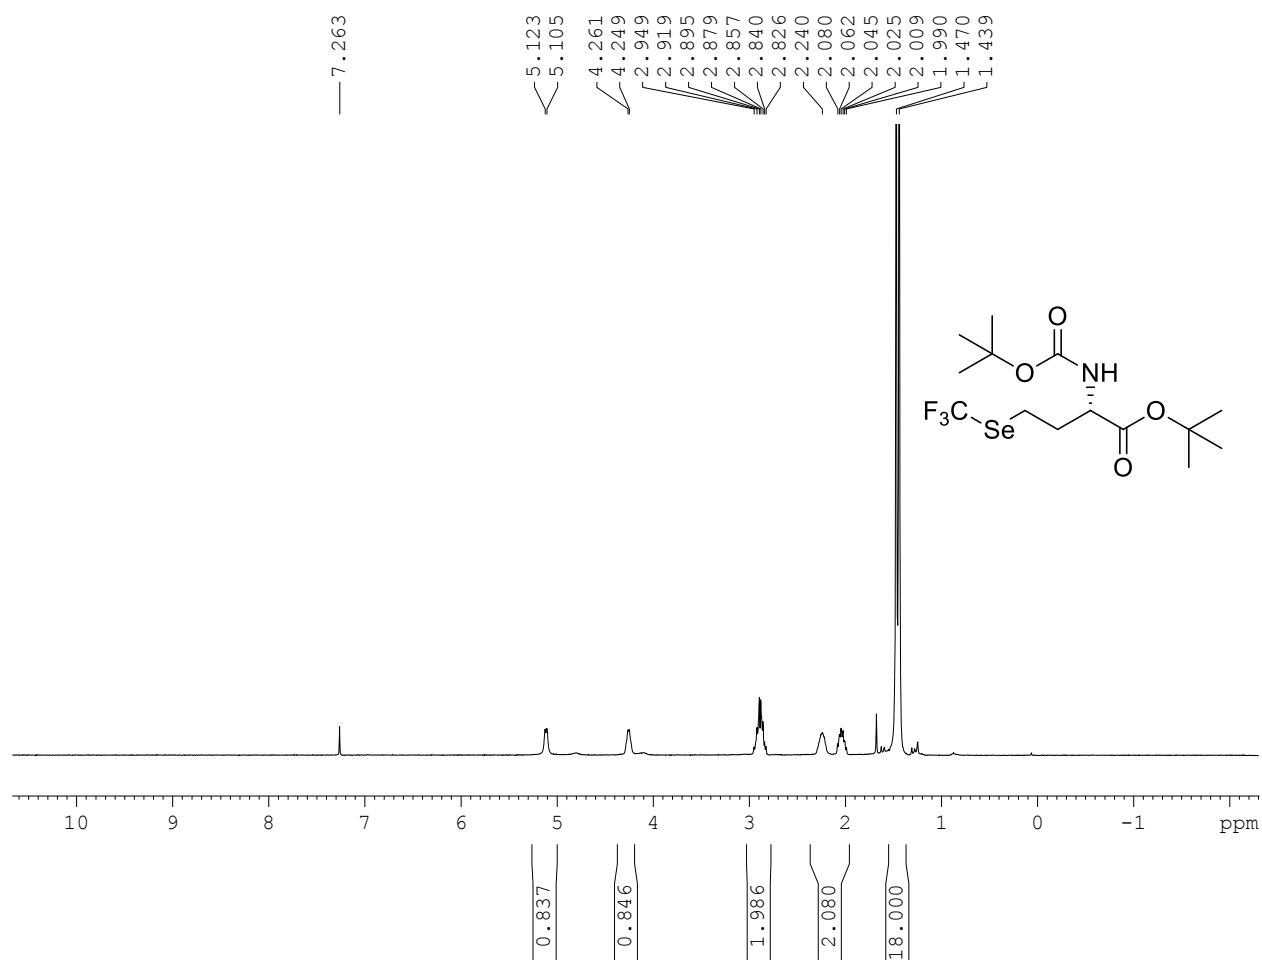



$^{13}\text{C}$  NMR in  $\text{CDCl}_3$  (100 MHz)

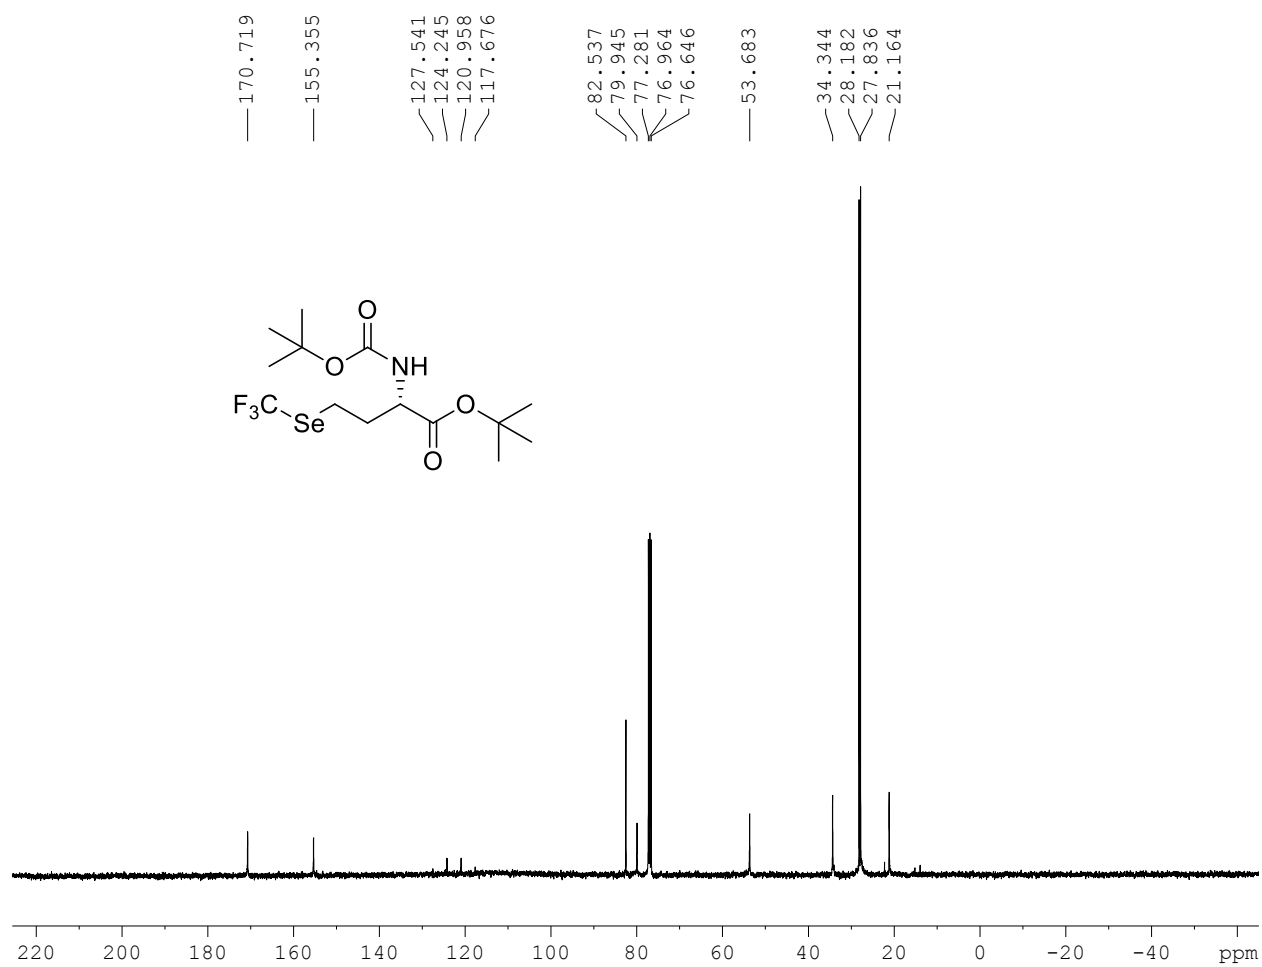

$^{19}\text{F}$  NMR in  $\text{CDCl}_3$  (376.5 MHz)

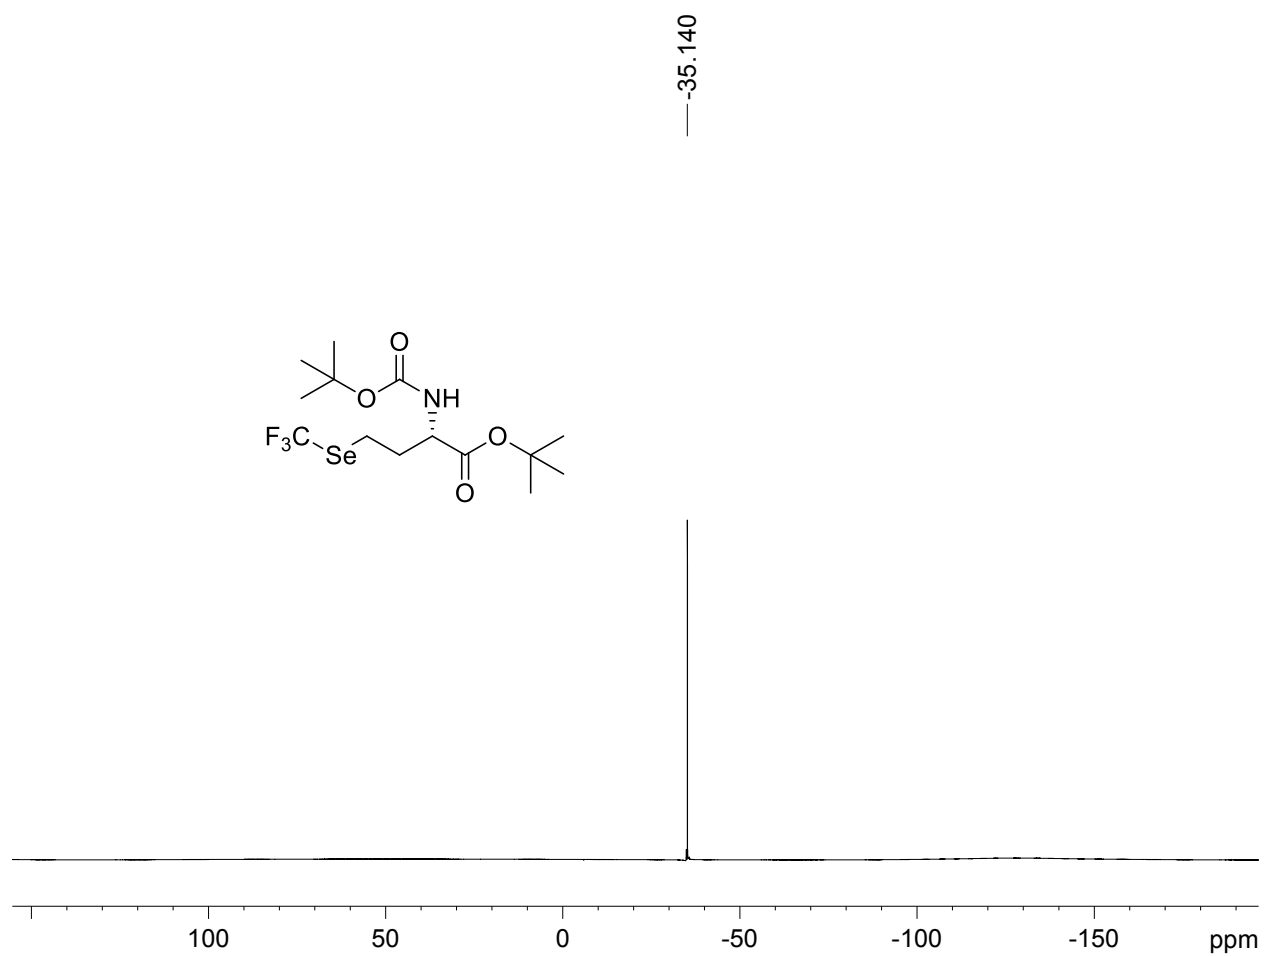

$^{77}\text{Se}$ -NMR in  $\text{CDCl}_3$  (95.3 MHz)

— 399.997

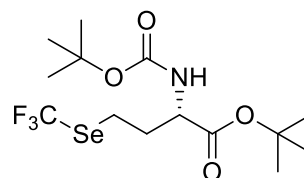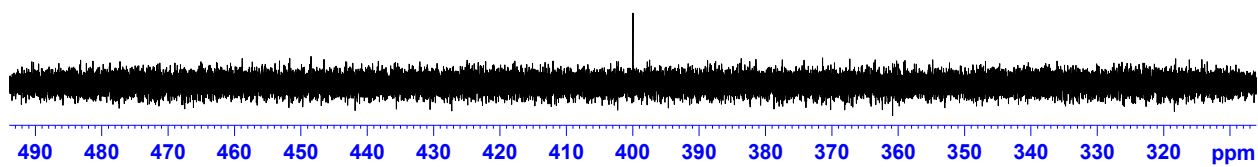

**(S)-1-Carboxy-3-((trifluoromethyl)selenanyl)propan-1-aminium 2,2,2-trifluoroacetate (7a)**

<sup>1</sup>H NMR in D<sub>2</sub>O (400 MHz)

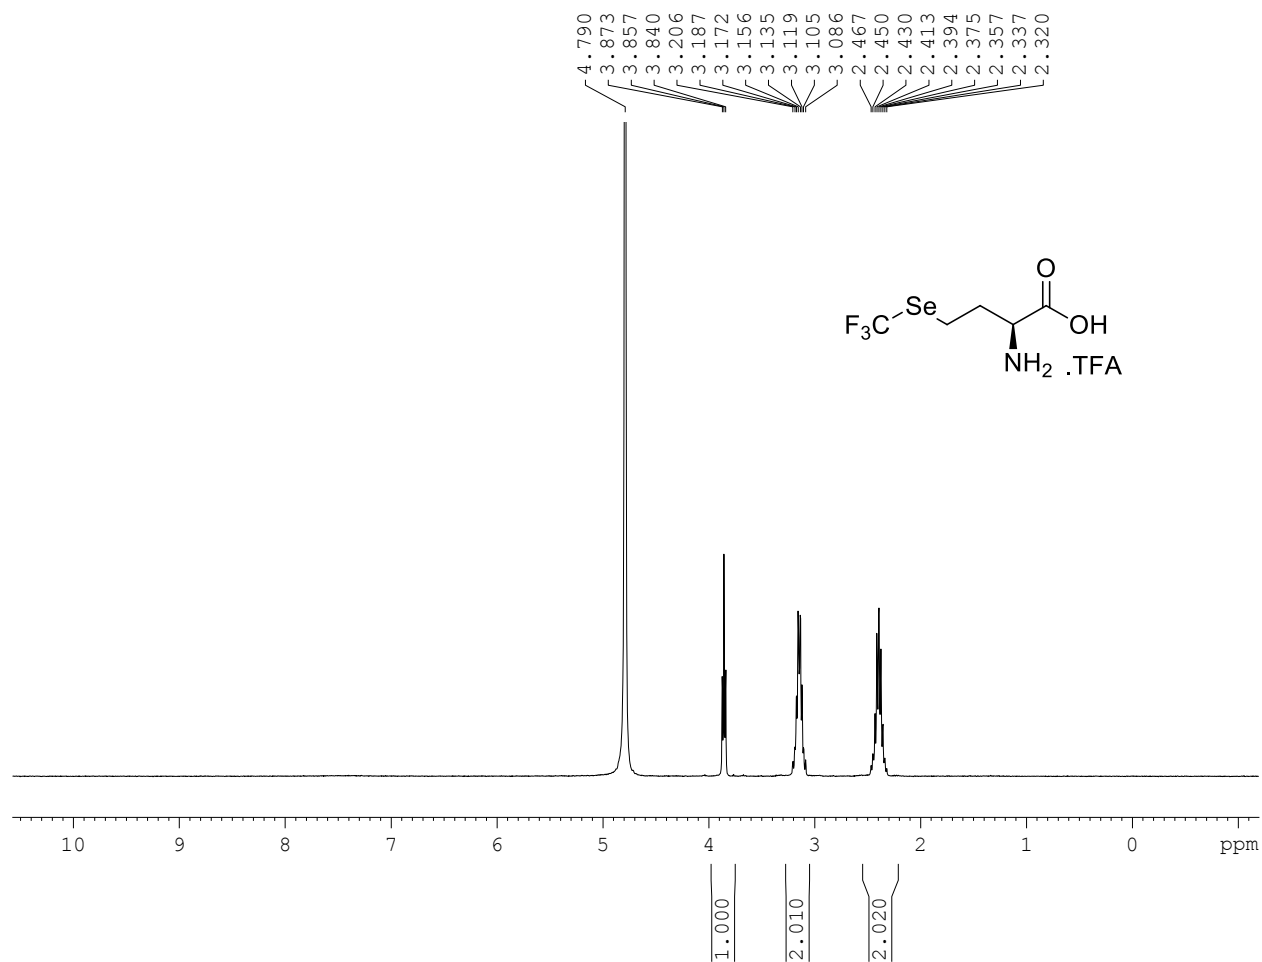

$^{13}\text{C}$  NMR in  $\text{D}_2\text{O}$  (100 MHz)

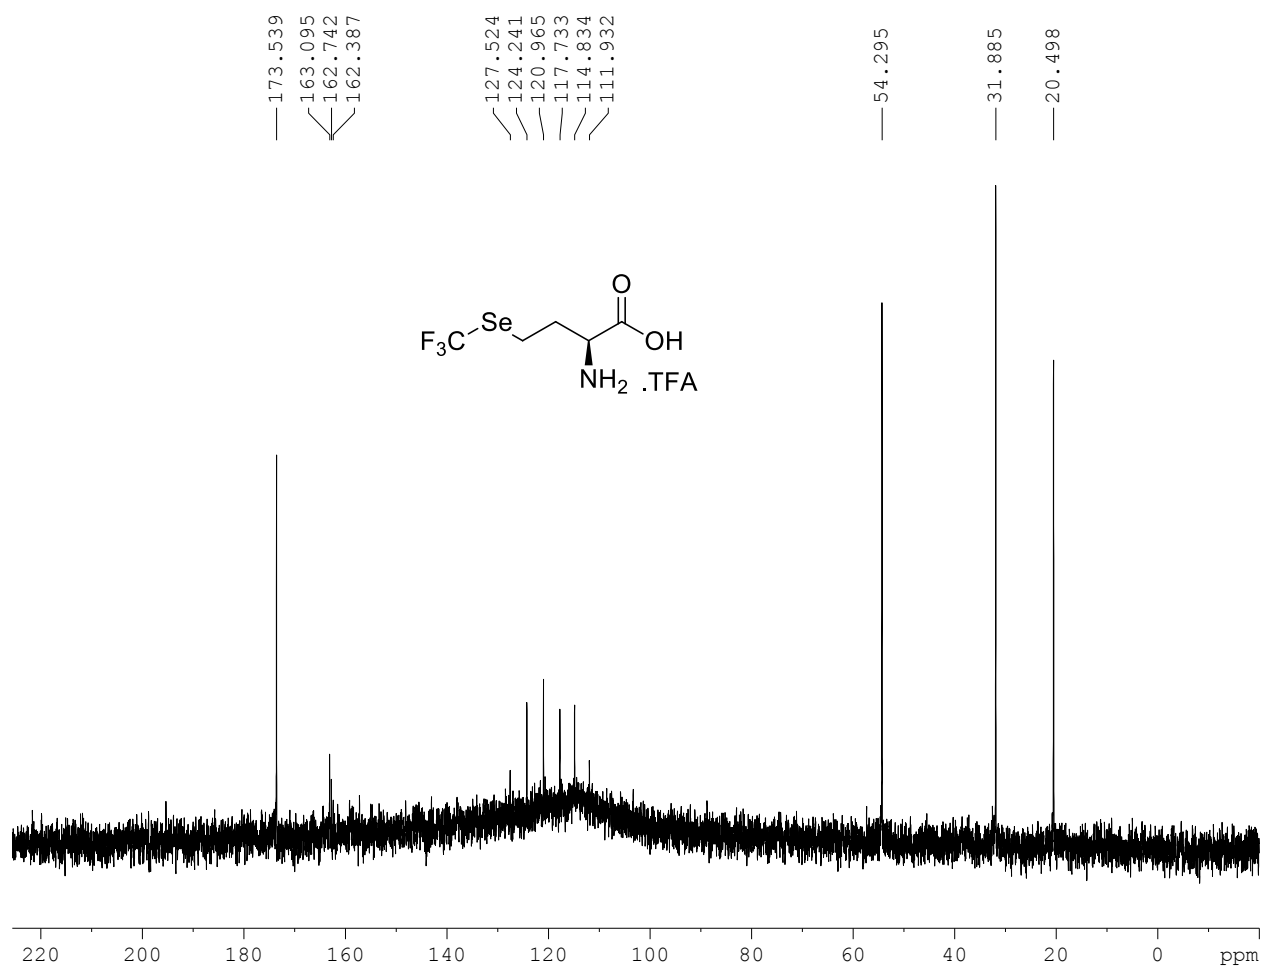

$^{19}\text{F}$  NMR in  $\text{D}_2\text{O}$  (376.5 MHz)

-35.120

-76.070

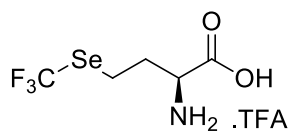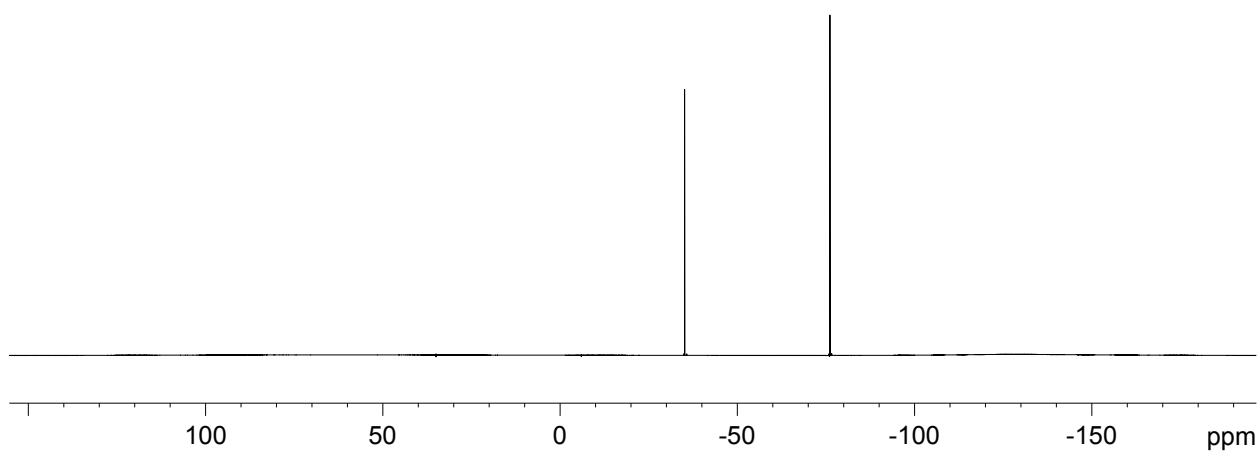

$^{77}\text{Se}$ -NMR in  $\text{D}_2\text{O}$  (95.3 MHz)

— 399.997

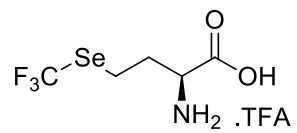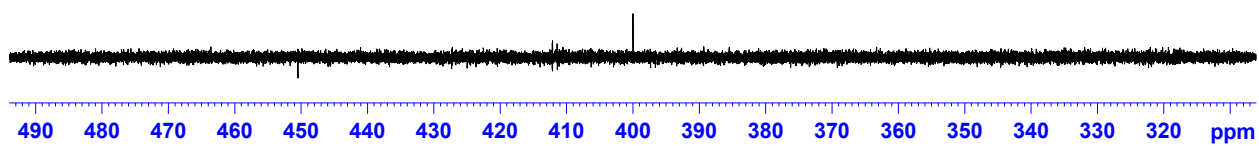

**(S)-1-Carboxy-3-((trifluoromethyl)selanyl)propan-1-aminium chloride (7b)**

$^1\text{H}$  NMR in  $\text{D}_2\text{O}$  (400 MHz)

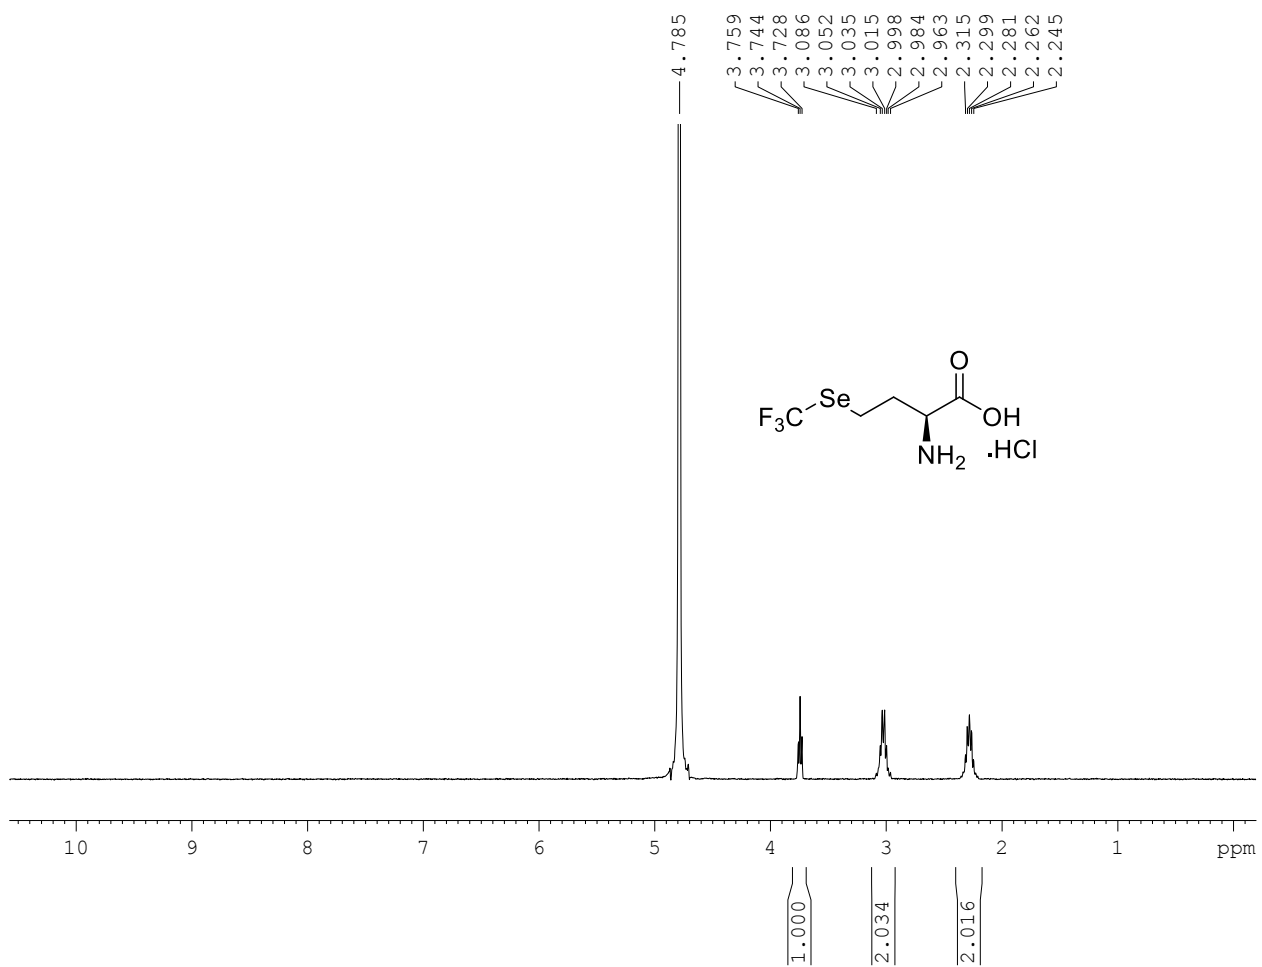



$^{13}\text{C}$  NMR in  $\text{D}_2\text{O}$  (100 MHz)

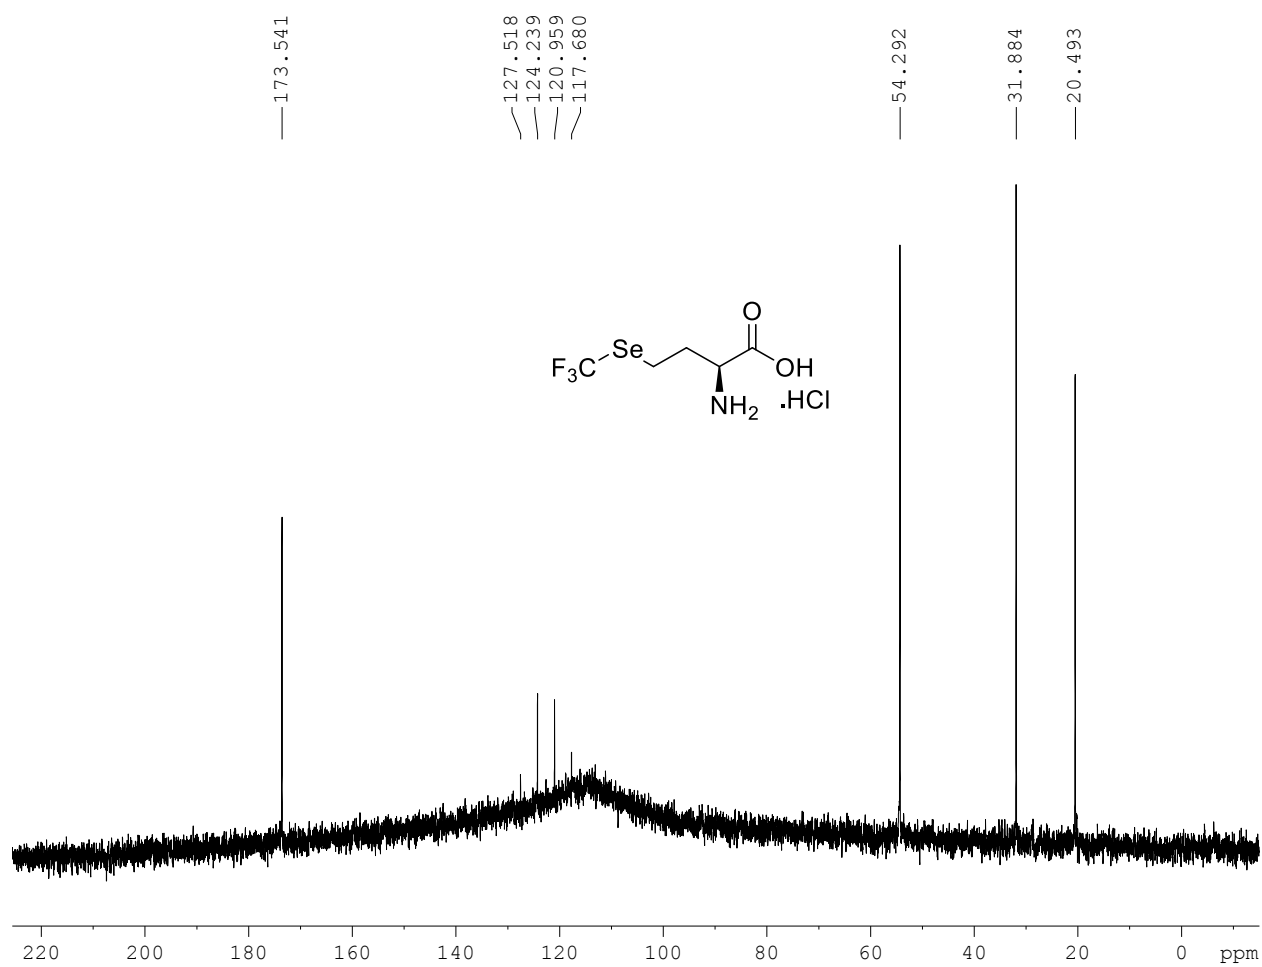

$^{19}\text{F}$  NMR in  $\text{D}_2\text{O}$  (376.5 MHz)

— -35.348

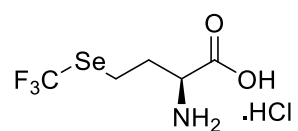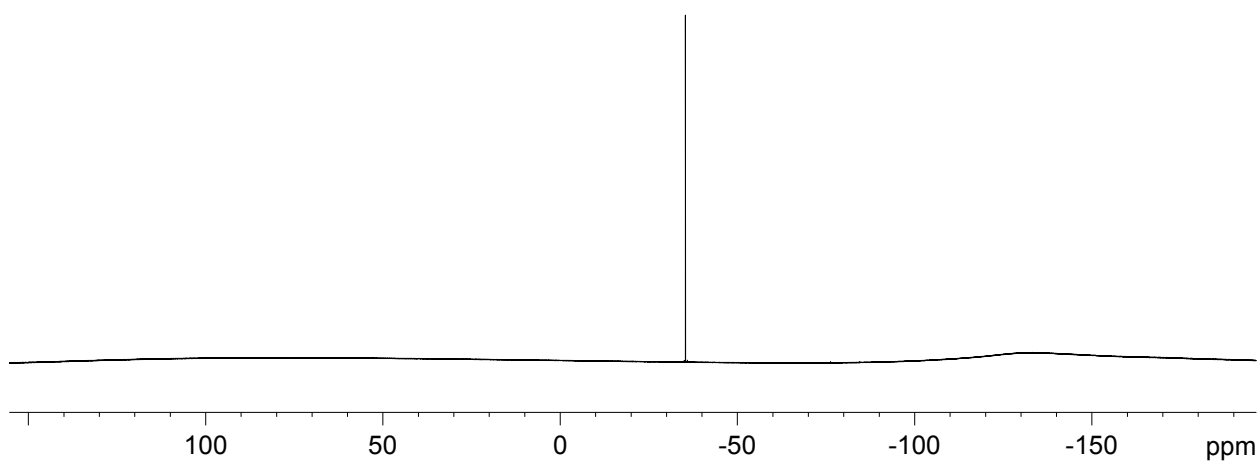

$^{77}\text{Se}$ -NMR in  $\text{D}_2\text{O}$  (95.3 MHz)

— 399.998

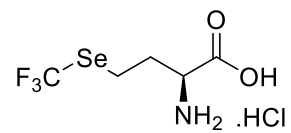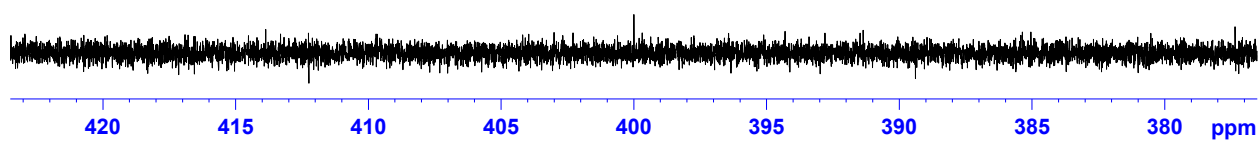

## Purity of 7a by absolute qNMR

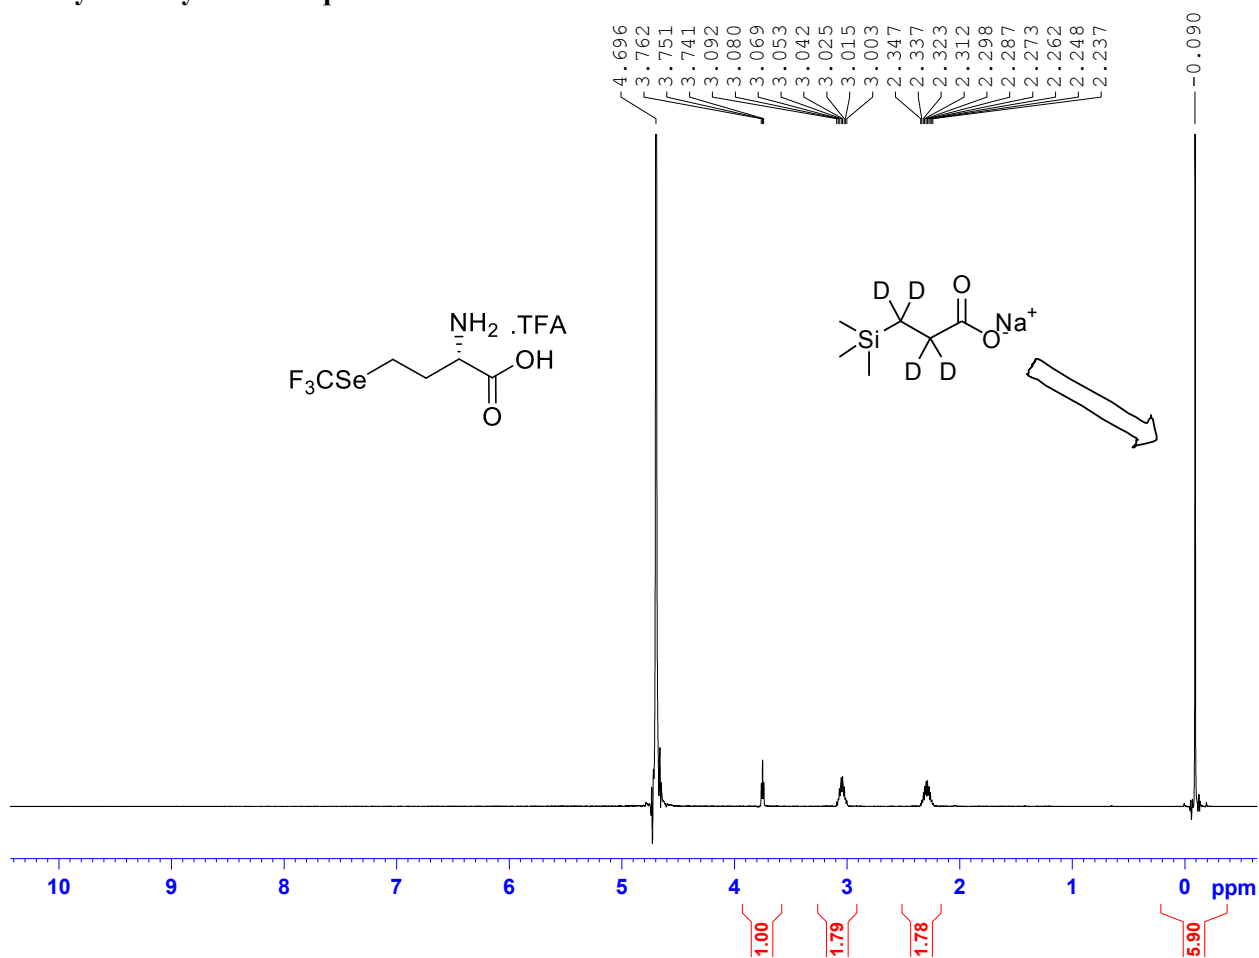

## Sample preparation

7.72 mg of **7a** and 2.50 mg of sodium 3-trimethylsilylpropionate (TMSP-2,2,3,3-D<sub>4</sub> internal calibrant) were transferred into standard NMR tube (5 mm) to which 0.6 mL of D<sub>2</sub>O was added.

## NMR Instrument/Software Controlled Parameters

*Pulse Program:* Single pulse, without carbon decoupling ('zg' with 90° pulse [Bruker])

*Data Points (acquired):* 64 K

*Zero-Filling (SI or FN):* to 256 K

*Dummy Scans:* 4

|                                    |         |
|------------------------------------|---------|
| <i>Pulse Width (P1 or PW)</i>      | 90° RT  |
| <i>Relaxation delay (D1)</i>       | 60      |
| <i>Acquisition time (AQ or AT)</i> | 3.63    |
| <i>Spectral Window (SW)</i>        | 30 ppm  |
| <i>Transmitter Offset</i>          | 7.5 ppm |
| <i>Number of Scans for 600 MHz</i> | 1       |

### C. Hardware dependent parameters

*Preacquisition Delay*: DE = 10  $\mu$ s (600 MHz Bruker Avance III HD equipped with quadruple resonance, HPCN, QCI-P cryoprobes); *90° Pulse Width* (P1 [Bruker] 9.60  $\mu$ s)

### D. Post-Acquisition Processing and Measurement of Integrals

|                                          |                      |
|------------------------------------------|----------------------|
| <i>Processing Using Line Broadening:</i> | LB = 0.4 Hz          |
| <i>Zero Filling:</i>                     | to 256K real data    |
| <i>Phasing:</i>                          | Bruker-FP-Automatic  |
| <i>Baseline Correction:</i>              | 5th order polynomial |

### Calculation

$$P[\%] = \frac{n_{IC} \cdot Int_t \cdot MW_t \cdot m_{IC}}{n_t \cdot Int_{IC} \cdot MW_{IC} \cdot m_s} \cdot P_{IC} = 98.06\%$$

Where:

Weight of the internal calibrant IC ( $m_{IC}$ ) = 2.50 mg

Weight of the sample ( $m_s$ ) = 7.72 mg

Area (integral) of the IC resonance signal being used for quantification ( $Int_{IC}$ ) = 5.90

Area (integral) of the target analyte (t) resonance signal being used for Quantification ( $Int_t$ ) = 1

Number of protons that give rise to  $Int_{IC}$  ( $n_{IC}$ ) = 9

Number of protons of the target analyte that give rise to  $Int_t$  ( $n_t$ ) = 1

Molecular weight of the internal calibrant ( $MW_{IC}$ ) = 172.26

Molecular weight of the target analyte ( $MW_t$ ) = 348.96 g/mol

Purity of the internal calibrant, as percent value ( $P_{IC}$ ) = 98%

Purity of **7a** (P[%]) = 98.06%

## Purity of 7b by absolute qNMR

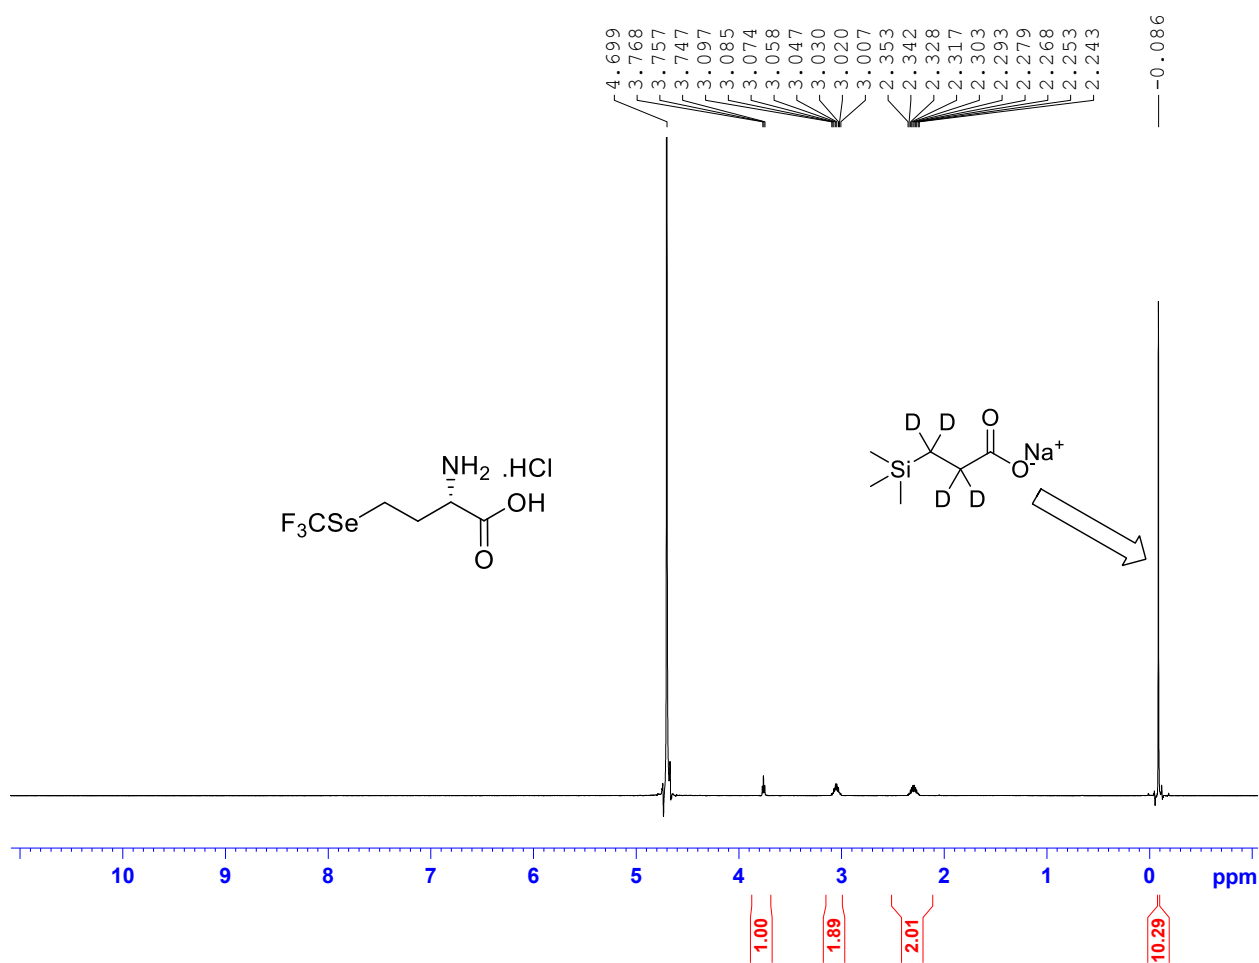

### Sample preparation

5.52 mg of **7b** and 3.81 mg of sodium 3-trimethylsilylpropionate (TMS-2,2,3,3-D<sub>4</sub> internal calibrant, IC) were transferred into standard NMR tube (5 mm) to which 0.6 mL of D<sub>2</sub>O was added.

### NMR Instrument/Software Controlled Parameters

*Pulse Program:* Single pulse, without carbon decoupling ('zg' with 90° pulse [Bruker])

*Data Points (acquired):* 64 K

*Zero-Filling (SI or FN):* to 256 K

*Dummy Scans:* 4

|                                    |        |
|------------------------------------|--------|
| <i>Pulse Width (P1 or PW)</i>      | 90° RT |
| <i>Relaxation delay (D1)</i>       | 60     |
| <i>Acquisition time (AQ or AT)</i> | 3.63   |

|                                    |         |
|------------------------------------|---------|
| <i>Spectral Window (SW)</i>        | 30 ppm  |
| <i>Transmitter Offset</i>          | 7.5 ppm |
| <i>Number of Scans for 600 MHz</i> | 1       |

### C. Hardware dependent parameters

Preacquisition Delay: DE = 10  $\mu$ s (600 MHz Bruker Avance III HD equipped with quadruple resonance, HPCN, QCI-P cryoprobes): 90° Pulse Width (P1 [Bruker] 9.60  $\mu$ s).

### D. Post-Acquisition Processing and Measurement of Integrals

Processing Using Line Broadening: LB = 0.1 Hz  
 Zero Filling: to 256K real data  
 Phasing: Bruker-FP- Automatic  
 Baseline Correction: 5th order polynomial

### Calculation

$$P[\%] = \frac{n_{IC} \cdot Int_t \cdot MW_t \cdot m_{IC}}{n_t \cdot Int_{IC} \cdot MW_{IC} \cdot m_s} \cdot P_{IC} = 98.40\%$$

Where:

Weight of the internal calibrant IC ( $m_{IC}$ ) = 3.81 mg

Weight of the sample ( $m_s$ ) = 5.52 mg

Area (integral) of the IC resonance signal being used for quantification ( $Int_{IC}$ ) = 10.29

Area (integral) of the target analyte (t) resonance signal being used for Quantification ( $Int_t$ ) = 1

Number of protons that give rise to  $Int_{IC}$  ( $n_{IC}$ ) = 9

Number of protons of the target analyte that give rise to  $Int_t$  ( $n_t$ ) = 1

Molecular weight of the internal calibrant ( $MW_{IC}$ ) = 172.26

Molecular weight of the target analyte ( $MW_t$ ) = 286.53 g/mol

Purity of the internal calibrant, as percent value ( $P_{IC}$ ) = 98%

Purity of **7b** (P[%]) = 98.40%
